# Supplementary material
Source: PubMed Central journal article supplement (PMC3370566)
Supplement: supp_78.12.4373_AEM00628-12_supplemental.pdf [file supp_78.12.4373_AEM00628-12_supplemental.pdf]

## **Supplemental material**

### **Complete sequence analysis of two methanotroph-specific *repABC* plasmids from *Methylocystis* sp. strain SC2**

Bomba Dam<sup>1</sup>, Michael Kube<sup>2, #</sup>, Somasri Dam<sup>1</sup>, Richard Reinhardt<sup>2</sup> and  
Werner Liesack<sup>1, \*</sup>

Max Planck Institute for Terrestrial Microbiology, Karl-von-Frisch-Str. 10,  
D-35043 Marburg, Germany<sup>1</sup>

Max Planck Institute for Molecular Genetics, Ihnestrasse 63,  
D-14195 Berlin, Germany<sup>2</sup>

\*Corresponding author

Mailing address: Max-Planck-Institut für terrestrische Mikrobiologie

Karl-von-Frisch-Str. 10, D-35043 Marburg, Germany

Phone: +49 (6421) 178 720 // Fax: +49 (6421) 178 809

Electronic mail address: [liesack@mpi-marburg.mpg.de](mailto:liesack@mpi-marburg.mpg.de)

<sup>#</sup>Present address:

Faculty of Agriculture and Horticulture, Humboldt-University of Berlin,

Lentzeallee 55/57, D-14195 Berlin, Germany

## **CONTENT:**

Supplemental Methods on the strategy to construct singleton *pmoC* deletion mutants.

Figure S1. Similarity dot plot of plasmid sequences, pBSC2-1 vs pBSC2-2.

Figure S2. PCR-based strategy to construct suicide vectors for singleton *pmoC* in-frame deletion.

Table S1. Oligonucleotide primers and plasmids used in this study.

Table S2. The ORFs present in pBSC2-1 and their annotations.

Table S3. The ORFs present in pBSC2-2 and their annotations.

## **Supplemental Methods**

### **Strategy to construct singleton *pmoC* deletion mutants.**

Attempts were made to create in-frame deletion mutants of all three singleton *pmoC* present in strain SC2. Primers used are listed in the [Supplemental Material Table S1](#) and a schematic representation of the method is provided in the [Supplemental Material Fig. S2](#). Briefly, PCR amplicons containing in-frame deletions were generated by fusion PCR and cloned in pJQ200SK. For production of these amplicons, four primers (A, B, C, and D) were designed to PCR-amplify an ~1,260-bp fragment carrying a *pmoC* in-frame deletion, using strain SC2 genomic DNA or the plasmids pBSC2-1 and pBSC2-2 as a template. Primers A and B were used to amplify the upstream flanking region of the singleton. Primer A contained a restriction site for cloning in pJQ200SK, and primer B contained a region complementary to the downstream flanking PCR fragment. Primers C and D were used to amplify the downstream flanking fragment of the singleton. Primer C contained a region complementary to the upstream flanking PCR fragment, and primer D contained a restriction site for cloning in pJQ200SK. The two flanking PCR fragments AB and CD were used as templates to generate the full-length in-frame deletion fragment in a second-round (fusion) PCR with primers A and D (see [Supplementary Fig. S2](#) and [Table S1](#) for the strategy to incorporate overlapping regions during PCR with primers B and C). The in-frame fragments were cloned in pJQ200SK and transformed into *E. coli* Top 10 [ $F^-$  *mcrA*  $\Delta$ (*mrr-hsdRMS-mcrBC*)  $\Phi$ 80*lacZ* $\Delta$ M15  $\Delta$ *lacX74* *recA1* *ara* $\Delta$ 139  $\Delta$ (*ara-leu*)7697 *galU* *galK* *rpsL* *endA1* *nupG*] and checked by sequencing. A kanamycin resistance gene was then inserted into all three constructs, as strain SC2 was found to be resistant to gentamicin (present in pJQ200SK). The Kan<sup>r</sup> cassette was PCR amplified from pCR2.1-TOPO vector (Invitrogen) using primers that introduced a BamHI site at both termini. In pJQC1 and pJQC3, the cassette was cloned in the BglIII site present within the gentamicin resistance gene in pJQ200SK.

In pJQC2, a BamHI site is present in the inserted AD PCR product; so the marker was cloned into a unique PstI site present at the extreme 3' end of the AD PCR product. To achieve this, the marker was PCR amplified from a different source (pBJ114), because the Kan<sup>r</sup> cassette amplified from pCR2.1-TOPO contains an internal PstI site. Note that the P15A origin of replication present in pJQ200SK will not be functional in strain SC2. Thus, the prepared constructs would function as suicide plasmids. They were introduced into strain SC2 by electroporation (using a 2-mm gap cuvette and Gene Pulser (Bio-Rad) set at 2.5 kV, 400  $\Omega$ , and 25  $\mu$ F) and recombinants were selected on kanamycin-containing AMS plates (described in the main text). The Kan<sup>r</sup> transformants from the single-crossover event also contained the *sacB* gene encoding levansucrase, which is lethal for many gram-negative bacteria when they are grown in presence of sucrose. This genotype allowed for a subsequent negative selection step, i.e., selection for the loss of integrated plasmid containing *sacB* during second recombination. Randomly selected first recombinants were then grown in AMS containing 5% sucrose for 2 days and spread on AMS plates containing 5% sucrose to select colonies that have lost the integrated plasmid through a second homologous crossover event. The recombinants should carry either the wild-type allele (reconstitution) or an in-frame deletion of the singleton *pmoC* (gene replacement). To check the second recombination event, at least 500 colonies (for each singleton knock-out experiment) were screened by colony PCR with primers E and F, which respectively bind upstream and downstream of primers A and D (see Supplementary Fig. S2).

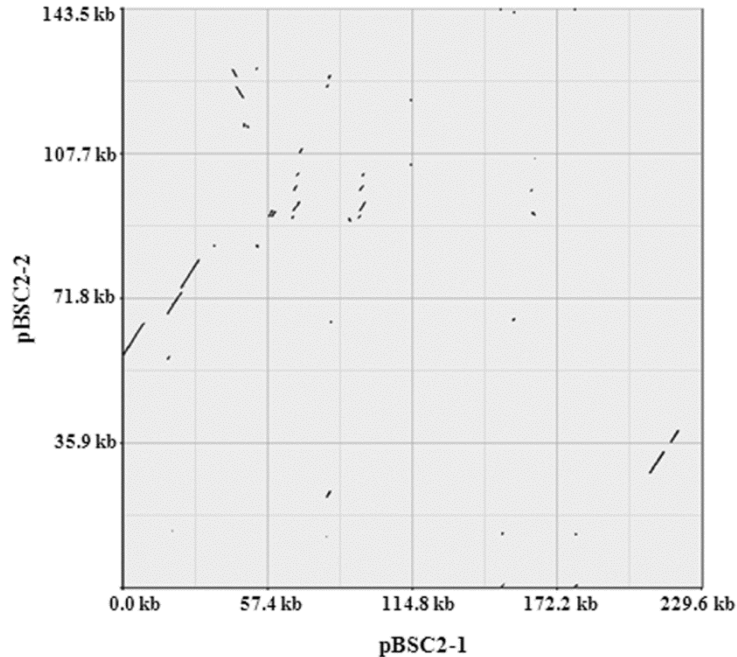

**Figure S1. Similarity dot plot of plasmid sequences, pBSC2-1 vs pBSC2-2.** The online tool zPicture (<http://zpicture.dcode.org/>), which aligns two sequences using BLAST engine for local alignment, was used to generate the dot plot. The pBSC2-1 and pBSC2-2 sequences are represented on the X- and Y-axis, respectively, and the numbers represent the base positions (note that the scale is different). Alignments are shown in the plot as lines. Plus strand matches are slanted from the bottom left to the upper right corner, minus strand matches are slanted from the upper left to the lower right. The number of lines shown in the plot is the same as the number of alignments found by BLAST. The plasmids have only a few conserved regions. Both plasmids share the same conserved replication module consisting of the *repABC* genes. Although both plasmids contain complete type IV secretion systems, they are not similar. Other common regions include genes encoding single-strand DNA binding protein, nitric oxide reductase and several small stretches of transposase and conserved hypothetical proteins.

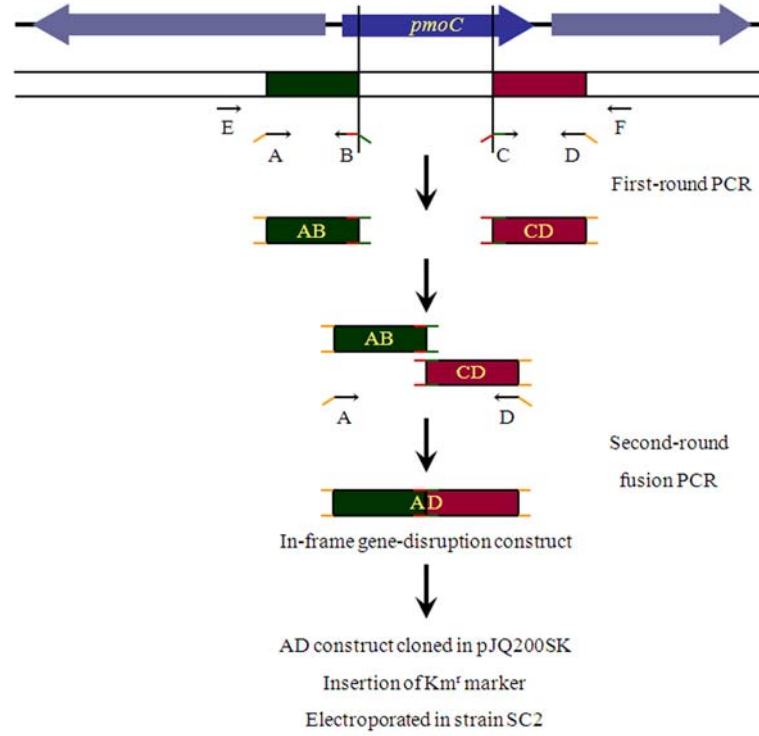

**Figure S2. PCR-based strategy to construct suicide vectors for singleton *pmoC* in-frame deletion** (see [Supplementary Methods](#) and Table S1 for details).

**Table S1. Oligonucleotide primers and plasmids used in this study**

| Name of primer/<br>plasmid                                        | Oligonucleotide sequence (5' to 3') <sup>a</sup> | Restriction site | Source/<br>reference |
|-------------------------------------------------------------------|--------------------------------------------------|------------------|----------------------|
|                                                                   | Plasmid features                                 |                  |                      |
| <b><u>Primers used to generate gene disruption constructs</u></b> |                                                  |                  |                      |
| C1G_A                                                             | CGC <b>GGATCC</b> CGGCATCATGAAGATCAATCC          | BamHI            | -                    |
| C1G_B                                                             | CTGAACGGGAAGGAAGGCGTCGCCCTC                      | -                | -                    |
| C1G_C                                                             | GCCTTCCTTCCCGTTCAGAACGGCCAG                      | -                | -                    |
| C1G_D                                                             | CCG <b>CTCGAG</b> CGGCTATTCCCTCGGACGT            | XhoI             | -                    |
| C2G_A                                                             | TGC <b>TCTAGA</b> TCTTTCTGACGCAGAGGCG            | XbaI             | -                    |
| C2G_B                                                             | GCCCGTTCGATGCGCTGGAACAGCTCT                      | -                | -                    |
| C2G_C                                                             | CAGCGCATCGGAACGGGCTCTGCTTT                       | -                | -                    |
| C2G_D                                                             | ACGC <b>GTCGAC</b> ACCTAAGTTCGGCGCTTGG           | SalI             | -                    |
| C3P_A                                                             | TGC <b>TCTAGA</b> CCCTCAACCCAATCGACCTA           | XbaI             | -                    |
| C3P_B                                                             | AACGCCTTCGCCTACCGGGATTGCGTA                      | -                | -                    |
| C3P_C                                                             | GCGGTAGGCGAAGGCGTTGAATTGCTGACG                   | -                | -                    |
| C3P_D                                                             | CGC <b>GGATCC</b> CCCGCACGAGCGCCAC               | BamHI            | -                    |
| C1G_E                                                             | CCGGGCGGAACCGCGG                                 | -                | -                    |
| C1G_F                                                             | CCAGCAATGCACCCGTGTGG                             | -                | -                    |
| C2G_E                                                             | GCGGTCGTCGCCGATCTCG                              | -                | -                    |
| C2G_F                                                             | GGCGCGAAGCGGCGTCG                                | -                | -                    |
| C3P_E                                                             | CGTGATACGAGCGCTGTAC                              | -                | -                    |
| C3P_F                                                             | CAGGAACTCTTCGCCGAC                               | -                | -                    |

|                 |                                          |       |   |
|-----------------|------------------------------------------|-------|---|
| <b>KanF_Bam</b> | GACGC <b>GGATCC</b> GATTTTCGGCCTATTGGTTA | BamHI | - |
| <b>KanR_Bam</b> | GACGC <b>GGATCC</b> ACCCAACCTGATCTTCAGCA | BamHI | - |
| <b>KanF_Pst</b> | AAA <b>CTGCAG</b> GGGTGCACGAGTGGGTTAC    | PstI  | - |
| <b>KanR_Pst</b> | AAA <b>CTGCAG</b> GGGCGTCGCTTGGTCGGT     | PstI  | - |

**Primers used to generate probes for Southern hybridization and to check plasmid loss**

|                          |                        |   |   |
|--------------------------|------------------------|---|---|
| <b>pmo2F<sup>b</sup></b> | CAACGCTTCGAAACGGAAAGCG | - | - |
| <b>pmo2R<sup>b</sup></b> | CCTTGACCTGCCAATATCGGA  | - | - |
| <b>PI-F<sup>c</sup></b>  | CAACCCGTTGTTGATGACAG   | - | - |
| <b>PI-R<sup>c</sup></b>  | GCGCTCATCCATTTTCTGAC   | - | - |
| <b>P2-F<sup>d</sup></b>  | GTGCATCTGGCCTGGTATCT   | - | - |
| <b>P2-R<sup>d</sup></b>  | CGAAACGTGAAACCCAGTCT   | - | - |

**Plasmids**

|                    |                                                                                           |   |            |
|--------------------|-------------------------------------------------------------------------------------------|---|------------|
| <b>pJQ200SK</b>    | Suicide vector; P15A <i>ori sacB</i> Gm <sup>r</sup>                                      | - | ATCC       |
| <b>pCR2.1-TOPO</b> | Source of Km <sup>r</sup> gene cassette                                                   | - | Invitrogen |
| <b>pJQC1</b>       | 1,260-bp fusion PCR obtained with C1G_A/C1G_D and cloned into BamHI-XhoI site of pJQ200SK | - | This study |
| <b>pJQC2</b>       | 1,260-bp fusion PCR obtained with C2G_A/C2G_D and cloned into XbaI-SalI site of pJQ200SK  | - | This study |
| <b>pJQC3</b>       | 1,260-bp fusion PCR obtained with C3P_A/C3P_D and cloned into XbaI-BamHI site of pJQ200SK | - | This study |
| <b>pJQC1-Km</b>    | BamHI-cut Km <sup>r</sup> -gene inserted into BglII-cut pJQC1                             | - | This study |
| <b>pJQC2-Km</b>    | PstI-cut Km <sup>r</sup> -gene inserted into PstI-cut pJQC2                               | - | This study |
| <b>pJQC3-Km</b>    | BamHI-cut Km <sup>r</sup> -gene inserted into BglII-cut pJQC3                             | - | This study |



<sup>a</sup> The green- and red-colored bases in primers B and C represent the complementary regions that were used for performing the second-round fusion PCR (see Supplementary Methods and Fig. S2 for details). Bases highlighted with yellow represent the restriction sites present in the respective primer (see column 3).

<sup>b</sup> The primer pair pmo2F and pmo2R amplifies a 1629-bp product from the *pmoCAB2* operon present in the genome (BX649604).

<sup>c</sup> The primer pair P1-F and P1-R amplifies a 1074-bp product from *mobD-mobE* region of pBSC2-1 (P1\_200 to P1\_201).

<sup>d</sup> The primer pair P2-F and P2-R amplifies an 1168-bp product from *parA-parB* region of pBSC2-2 (P2\_23 to P2\_24).

**Table S2. The ORFs present in pBSC2-1 and their annotations.**

| ORF identifier | Begin cds | End cds | Size (aa) | First codon | % G+C content | Product                                            | Gene Name | Organism of protein to which most similar     | Homolog protein                              | Similarity (e- value)              |
|----------------|-----------|---------|-----------|-------------|---------------|----------------------------------------------------|-----------|-----------------------------------------------|----------------------------------------------|------------------------------------|
| <b>P1_1</b>    | 40        | 2100    | 687       | ATG         | 62.98         | Putative DNA-binding protein                       | -         | <i>Methylocystis</i> sp. strain Rockwell      | ParB domain protein nuclease                 | 65% identical over 665 aa (0.0)    |
| <b>P1_2</b>    | 2278      | 2685    | 136       | ATG         | 60.05         | Conserved hypothetical protein                     | -         | <i>Sphingomonas wittichii</i>                 | Uncharacterized protein                      | 50% identical over 127 aa (5e-33)  |
| <b>P1_3</b>    | 2833      | 7278    | 1482      | ATG         | 64.44         | Putative methylase/helicase                        | -         | <i>Methylocystis</i> sp. strain Rockwell      | Putative methylase/helicase                  | 86% identical over 1471 aa (0.0)   |
| <b>P1_4</b>    | 7298      | 8293    | 332       | ATG         | 59.64         | Conserved hypothetical protein                     | -         | <i>Methylocystis</i> sp. strain Rockwell      | Hypothetical protein Met49242DRAFT_3583      | 69% identical over 323 aa (6e-150) |
| <b>P1_5</b>    | 8293      | 8925    | 211       | ATG         | 60.35         | Conserved hypothetical protein                     | -         | <i>Sinorhizobium meliloti</i>                 | Uncharacterized protein                      | 71% identical over 45 aa (2e-12)   |
| <b>P1_6</b>    | 10573     | 9005    | 523       | ATG         | 59.27         | Conserved hypothetical protein                     | -         | <i>Acinetobacter</i> sp. SH024                | Predicted protein                            | 29% identical over 248 aa (1e-23)  |
| <b>P1_7</b>    | 13047     | 10582   | 822       | ATG         | 64.44         | Conserved hypothetical protein                     | -         | <i>Oligotropha carboxidovorans</i> OM5        | Hypothetical protein OCA5_pOC16701600        | 78% identical over 822 aa (0.0)    |
| <b>P1_8</b>    | 14051     | 13068   | 238       | ATG         | 62.3          | AAA ATPase                                         | -         | <i>Oligotropha carboxidovorans</i> ATCC 49405 | AAA ATPase central domain-containing protein | 81% identical over 328 aa (0.0)    |
| <b>P1_9</b>    | 16331     | 14898   | 478       | ATG         | 62.48         | Conserved hypothetical protein                     | -         | <i>Rhodobacter sphaeroides</i> BisA53         | Hypothetical protein RPE_2955                | 58% identical over 476 aa (0.0)    |
| <b>P1_10</b>   | 17477     | 16419   | 353       | ATG         | 61.1          | Fic family protein (filamentation induced by cAMP) | -         | <i>Polymorphum gilvum</i> SL003B-26A1         | Bacterial regulatory protein, AsnC family    | 83% identical over 351 aa (0.0)    |

|              |       |       |     |     |       |                                    |   |                                                          |                                                |                                       |
|--------------|-------|-------|-----|-----|-------|------------------------------------|---|----------------------------------------------------------|------------------------------------------------|---------------------------------------|
| <b>P1_11</b> | 18050 | 18985 | 312 | ATG | 60.79 | Conserved hypothetical protein     | - | <i>Methylocystis</i> sp. strain<br>Rockwell              | Protein of unknown<br>function DUF2493         | 85% identical over<br>311 aa (0.0)    |
| <b>P1_12</b> | 19169 | 20374 | 402 | GTG | 59.78 | Plasmid partitioning protein, RepA | - | <i>Rhizobium leguminosarum</i><br>bv. <i>viciae</i> 3841 | Replication protein, RepA                      | 73% identical over<br>388 aa (0.0)    |
| <b>P1_13</b> | 20380 | 21375 | 332 | ATG | 62.25 | Plasmid partitioning protein, RepB | - | <i>Nitrobacter hamburgensis</i><br>X14                   | ParB family protein                            | 53% identical over<br>326 aa (6e-109) |
| <b>P1_14</b> | 21602 | 22969 | 439 | ATG | 64.54 | Replication protein C              | - | <i>Methylocystis</i> sp. strain<br>Rockwell              | Replication protein C                          | 71% identical over<br>439 aa (0.0)    |
| <b>P1_15</b> | 23002 | 23256 | 85  | ATG | 60.39 | Hypothetical protein               | - | No significant homology                                  | -                                              | -                                     |
| <b>P1_16</b> | 24510 | 23272 | 413 | ATG | 65.86 | Phage integrase                    | - | <i>Methylocystis</i> sp. strain<br>Rockwell              | Integrase domain protein<br>SAM domain protein | 71% identical over<br>387 aa (0.0)    |
| <b>P1_17</b> | 24603 | 26216 | 538 | ATG | 66.42 | Transposase                        | - | <i>Mesorhizobium loti</i><br>MAFF303099                  | Transposase                                    | 47% identical over<br>488 aa (1e-140) |
| <b>P1_18</b> | 26212 | 27090 | 293 | ATG | 64.85 | TniB transposase                   | - | <i>Rhodobacter sphaeroides</i><br>ATCC 17025             | Hypothetical protein<br>Rsph17025_4235         | 67% identical over<br>293 aa (2e-136) |
| <b>P1_19</b> | 27090 | 28130 | 347 | TTG | 69.45 | Conserved hypothetical protein     | - | <i>Rhodobacter sphaeroides</i><br>ATCC 17025             | Hypothetical protein<br>Rsph17025_4234         | 45% identical over<br>319 aa (3e-71)  |
| <b>P1_20</b> | 28199 | 28402 | 68  | ATG | 58.82 | Hypothetical protein               | - | No significant homology                                  | -                                              | -                                     |
| <b>P1_21</b> | 28456 | 29514 | 353 | ATG | 68.46 | Conserved hypothetical protein     | - | <i>Methylocystis</i> sp. strain<br>Rockwell              | Protein of unknown<br>function DUF1403         | 52% identical over<br>353 aa (6e-77)  |
| <b>P1_22</b> | 29641 | 30345 | 235 | ATG | 65.96 | Putative transcriptional regulator | - | <i>Nitrobacter hamburgensis</i><br>X14                   | Putative transcriptional<br>regulator          | 60% identical over<br>201 aa (1e-76)  |
| <b>P1_23</b> | 31009 | 30536 | 158 | ATG | 65.4  | Conserved hypothetical protein     | - | <i>Methylocella silvestris</i> BL2<br>Msil_0068          | Hypothetical protein                           | 41% identical over<br>78 aa (7e-04)   |
| <b>P1_24</b> | 31381 | 31091 | 97  | ATG | 65.64 | Histidine kinase                   | - | <i>Trichophyton rubrum</i> CBS                           | Histidine kinase                               | 36% identical over                    |

|              |       |       |     |     |       |                                                             |   |                                             |                                           |                                       |
|--------------|-------|-------|-----|-----|-------|-------------------------------------------------------------|---|---------------------------------------------|-------------------------------------------|---------------------------------------|
|              |       |       |     |     |       |                                                             |   | 118892                                      |                                           | 57 aa (0.58)                          |
| <b>P1_25</b> | 31567 | 31442 | 42  | ATG | 52.38 | Hypothetical protein                                        | - | No significant homology                     | -                                         | -                                     |
| <b>P1_26</b> | 31650 | 31841 | 64  | TTG | 59.9  | Tryptophanyl-tRNA synthetase                                |   | <i>Burkholderia gladioli</i> BSR3           | Tryptophanyl-tRNA synthetase II           | 40% identical over<br>56 aa (0.35)    |
| <b>P1_27</b> | 32003 | 32356 | 118 | GTG | 58.19 | NAD-dependent epimerase/dehydratase                         |   | <i>Nitrosococcus watsoni</i> C-113          | NAD-dependent epimerase/dehydratase       | 43% identical over<br>111 aa (4e-15)  |
| <b>P1_28</b> | 33109 | 32852 | 86  | GTG | 60.47 | Transposase                                                 |   | <i>Methylosinus trichosporium</i> OB3b      | Transposase                               | 62% identical over<br>50 aa (2e-14)   |
| <b>P1_29</b> | 33689 | 33126 | 188 | ATG | 60.46 | Transposase                                                 |   | <i>Octadecabacter antarcticus</i> 238       | Transposase                               | 53% identical over<br>106 aa (8e-21)  |
| <b>P1_30</b> | 34180 | 34755 | 192 | ATG | 60.76 | Cytochrome C family protein, di-heme cytochrome C (Class I) |   | <i>Oceanicola batsensis</i> HTCC2597        | Di-heme cytochrome C (Class I)            | 53% identical over<br>174 aa (6e-66)  |
| <b>P1_31</b> | 34764 | 35210 | 149 | ATG | 56.82 | Conserved hypothetical protein                              |   | <i>Pseudomonas stutzeri</i> A1501           | Hypothetical protein PST_3374             | 75% identical over<br>138 aa (2e-74)  |
| <b>P1_32</b> | 35258 | 36277 | 340 | ATG | 59.51 | V-type H(+)-translocating pyrophosphatase                   | - | <i>Spirosoma linguale</i> DSM 74            | V-type H(+)-translocating pyrophosphatase | 42% identical over<br>162 aa (1e-25)  |
| <b>P1_33</b> | 36619 | 36395 | 75  | GTG | 61.33 | Transposase                                                 | - | <i>Acetobacter pasteurianus</i> IFO 3283-01 | Transposase                               | 89% identical over<br>38 aa (2e-15)   |
| <b>P1_34</b> | 36845 | 36648 | 66  | ATG | 59.09 | Conserved hypothetical protein                              | - | <i>Desulfotomaculum acetoxidans</i> DSM 771 | Conserved hypothetical protein            | 55% identical over<br>42 aa (2e-08)   |
| <b>P1_35</b> | 36938 | 37630 | 231 | ATG | 65.51 | Transposase, mutator type                                   | - | <i>Xanthobacter autotrophicus</i> Py2       | Transposase mutator type                  | 82% identical over<br>231 aa (3e-138) |
| <b>P1_36</b> | 37690 | 38205 | 172 | ATG | 63.37 | Transposase, mutator type                                   | - | <i>Rhodopseudomonas palustris</i> BisA53    | Transposase, mutator type                 | 88% identical over<br>129 aa (1e-76)  |
| <b>P1_37</b> | 39514 | 38351 | 388 | ATG | 63.75 | Transposase, IS116/IS110/IS902                              | - | <i>Nitrobacter hamburgensis</i>             | Transposase, IS116/IS110/                 | 62% identical over                    |

|              |       |       |     |     |       |                                                |              |                                               |                                                |                                    |
|--------------|-------|-------|-----|-----|-------|------------------------------------------------|--------------|-----------------------------------------------|------------------------------------------------|------------------------------------|
|              |       |       |     |     |       | family protein                                 |              | X14                                           | IS902 family protein                           | 380 aa (3e-164)                    |
| <b>P1_38</b> | 39823 | 40275 | 151 | ATG | 59.6  | Transposase, IS116/IS110/IS902 family protein  | -            | <i>Ochrobactrum anthropi</i> ATCC 49188       | Transposase, IS116/IS110/IS902 family protein  | 79% identical over 149 aa (9e-80)  |
| <b>P1_39</b> | 41475 | 40639 | 279 | ATG | 57.11 | Conserved hypothetical protein                 | -            | <i>Methylobacterium populi</i> BJ001          | Hypothetical protein Mpop_2534                 | 62% identical over 254 aa (1e-110) |
| <b>P1_40</b> | 42835 | 41489 | 449 | ATG | 56.27 | Conserved hypothetical protein                 | -            | <i>Methylobacterium populi</i> BJ001          | Hypothetical protein Mpop_2535                 | 70% identical over 441 aa (0.0)    |
| <b>P1_41</b> | 43327 | 43049 | 93  | TTG | 57.35 | Transcriptional regulator, LysR family protein | -            | <i>Roseovarius</i> sp. TM1035                 | Transcriptional regulator, LysR family protein | 60% identical over 70 aa (4e-18)   |
| <b>P1_42</b> | 43339 | 43536 | 66  | GTG | 61.11 | Hypothetical protein                           | -            | No significant homology                       | -                                              | -                                  |
| <b>P1_43</b> | 43645 | 44853 | 403 | ATG | 65.43 | NnrS protein                                   | -            | <i>Nitrobacter</i> sp. Nb-311A                | NnrS family protein                            | 47% identical over 393 aa (5e-98)  |
| <b>P1_44</b> | 45296 | 44901 | 132 | ATG | 60.35 | Invasion gene expression up-regulator, SirB    | -            | <i>Oceanobacter</i> sp. RED65                 | Invasion gene expression up-regulator, SirB    | 34% identical over 131 aa (4e-17)  |
| <b>P1_45</b> | 47615 | 45312 | 768 | GTG | 62.54 | Nitric-oxide reductase                         | -            | <i>Parvibaculum lavamentivorans</i> DS-1      | Putative nitric-oxide reductase                | 74% identical over 767 aa (0.0)    |
| <b>P1_46</b> | 47778 | 48065 | 96  | GTG | 55.56 | Alanine racemase                               | -            | <i>Treponema pallidum</i>                     | Alanine racemase                               | 40% identical over 44 aa (0.025)   |
| <b>P1_47</b> | 48458 | 48649 | 64  | ATG | 66.67 | Putative transposase IS1312, IS3 family        | -            | <i>Magnetospirillum gryphiswaldense</i> MSR-1 | Putative transposase IS1312, IS3 family        | 71% identical over 59 aa (1e-23)   |
| <b>P1_48</b> | 48924 | 49355 | 144 | ATG | 60.65 | Transposase (integrase)                        | -            | <i>Oligotropha carboxidovorans</i> OM5        | Integrase                                      | 72% identical over 141 aa (2e-67)  |
| <b>P1_49</b> | 49785 | 49366 | 140 | ATG | 56.19 | GTP cyclohydrolase I                           | <i>folE2</i> | <i>Methylocystis</i> sp. strain Rockwell      | GTP cyclohydrolase I                           | 86% identical over 101 aa (9e-59)  |

|              |       |       |     |     |       |                                                       |   |                                             |                                                       |                                       |
|--------------|-------|-------|-----|-----|-------|-------------------------------------------------------|---|---------------------------------------------|-------------------------------------------------------|---------------------------------------|
| <b>P1_50</b> | 50183 | 52876 | 898 | ATG | 59.69 | Copper-translocating P-type ATPase                    | - | <i>Nitrosococcus halophilus</i><br>Nc4      | Copper-translocating P-type ATPase                    | 68% identical over<br>686 aa (0.0)    |
| <b>P1_51</b> | 53410 | 53051 | 120 | GTG | 54.44 | Transposase                                           | - | <i>Sinorhizobium meliloti</i>               | Hypothetical transposase                              | 64% identical over<br>118 aa (2e-45)  |
| <b>P1_52</b> | 55105 | 53990 | 372 | TTG | 63.17 | Putative ABC transporter ATP binding protein/permease | - | <i>Bradyrhizobium</i> sp. BTAi1             | Putative ABC transporter ATP binding protein/permease | 40% identical over<br>333 aa (7e-75)  |
| <b>P1_53</b> | 55462 | 55211 | 84  | GTG | 57.14 | RNA polymerase, sigma-24 subunit, ECF subfamily       | - | <i>Methylocystis</i> sp. strain<br>Rockwell | RNA polymerase, sigma-24 subunit, ECF subfamily       | 88% identical over<br>33 aa (6e-12)   |
| <b>P1_54</b> | 56337 | 55603 | 245 | ATG | 61.5  | Conserved hypothetical protein                        | - | <i>Methylosinus trichosporium</i><br>OB3b   | Conserved hypothetical protein                        | 39% identical over<br>198 aa (3e-23)  |
| <b>P1_55</b> | 56699 | 56496 | 68  | ATG | 63.73 | Copper-translocating P-type ATPase                    | - | <i>Cyclobacterium marinum</i><br>DSM<br>745 | Copper-translocating P-type ATPase                    | 77% identical over<br>26 aa (2e-06)   |
| <b>P1_56</b> | 57327 | 57872 | 182 | ATG | 59.34 | Glucan 1,4-alpha-glucosidase                          | - | <i>Methylocystis</i> sp. strain<br>Rockwell | Glucan 1,4-alpha-glucosidase                          | 62% identical over<br>181 aa (3e-74)  |
| <b>P1_57</b> | 58018 | 58716 | 233 | ATG | 63.95 | Transposase, IS116/IS110/ IS902 family protein        | - | <i>Paracoccus denitrificans</i><br>PD1222   | Transposase, IS116/IS110/ IS902 family protein        | 67% identical over<br>221 aa (3e-103) |
| <b>P1_58</b> | 58706 | 59029 | 108 | ATG | 61.73 | Transposase of ISMdi12, IS110 family                  | - | <i>Methylobacterium extorquens</i><br>DM4   | Transposase of ISMdi12, IS110 family                  | 71% identical over<br>103 aa (3e-46)  |
| <b>P1_59</b> | 59301 | 60392 | 364 | ATG | 58.24 | Transposase, IS116/IS110/ IS902 family protein        | - | <i>Nitrobacter hamburgensis</i><br>X14      | Transposase, IS116/IS110/ IS902 family protein        | 72% identical over<br>343 aa (0.0)    |
| <b>P1_60</b> | 61104 | 60856 | 83  | ATG | 56.22 | Hypothetical protein                                  | - | No significant homology                     | -                                                     | -                                     |
| <b>P1_61</b> | 61694 | 61254 | 147 | ATG | 61.45 | Conserved hypothetical protein                        | - | <i>Sulfitobacter</i> sp. NAS-14.1           | Hypothetical protein                                  | 55% identical over                    |

|              |       |       |     |     |       |                                               |   |                                          |                                                            |                                       |
|--------------|-------|-------|-----|-----|-------|-----------------------------------------------|---|------------------------------------------|------------------------------------------------------------|---------------------------------------|
|              |       |       |     |     |       |                                               |   |                                          | NAS141_01721                                               | 40 aa (0.012)                         |
| <b>P1_62</b> | 61847 | 62140 | 98  | GTG | 62.24 | Hypothetical protein                          | - | No significant homology                  | -                                                          | -                                     |
| <b>P1_63</b> | 62390 | 63340 | 317 | ATG | 59.31 | Phosphofructokinase                           | - | <i>Rhodopseudomonas palustris</i> DX-1   | Phosphofructokinase                                        | 56% identical over<br>312 aa (1e-86)  |
| <b>P1_64</b> | 63606 | 64118 | 171 | ATG | 61.79 | Phosphoenolpyruvate synthase                  | - | <i>Burkholderia</i> sp. CCGE1003         | Phosphoenolpyruvate synthase                               | 64% identical over<br>128 aa (5e-36)  |
| <b>P1_65</b> | 64135 | 65370 | 412 | ATG | 59.79 | D-isomer specific 2-hydroxyacid dehydrogenase | - | <i>Methylocystis</i> sp. strain Rockwell | D-isomer specific 2-hydroxyacid dehydrogenase, NAD-binding | 64% identical over<br>318 aa (8e-147) |
| <b>P1_66</b> | 65411 | 66454 | 348 | ATG | 59.2  | Glyceraldehyde-3-phosphate dehydrogenase      | - | <i>Novosphingobium</i> sp. PP1Y          | Glyceraldehyde-3-phosphate dehydrogenase                   | 79% identical over<br>347 aa (0.0)    |
| <b>P1_67</b> | 66825 | 67232 | 136 | TTG | 62.01 | Conserved hypothetical protein                | - | <i>Rhodopseudomonas palustris</i> BisA53 | Hypothetical protein RPE_1013                              | 69% identical over<br>39 aa (3e-08)   |
| <b>P1_68</b> | 68941 | 67358 | 528 | GTG | 63.51 | Transposase                                   | - | <i>Methylocystis</i> sp. strain Rockwell | Transposase and inactivated derivative                     | 89% identical over<br>523 aa (0.0)    |
| <b>P1_69</b> | 69332 | 68982 | 117 | ATG | 63.25 | Transposase, IS66 Orf2 family protein         | - | <i>Methylocystis</i> sp. strain Rockwell | Transposase, IS66 Orf2 family protein                      | 95% identical over<br>117 aa (2e-75)  |
| <b>P1_70</b> | 69790 | 69335 | 152 | ATG | 67.54 | Transposase, IS3/IS911 family protein         | - | <i>Methylocystis</i> sp. strain Rockwell | Transposase, IS3/IS911 family protein                      | 64% identical over<br>152 aa (4e-59)  |
| <b>P1_71</b> | 69978 | 71126 | 383 | TTG | 59.97 | YVTN beta-propeller repeat-containing protein | - | <i>Polaromonas naphthalenivorans</i> CJ2 | YVTN beta-propeller repeat-containing protein              | 32% identical over<br>263 aa (1e-34)  |
| <b>P1_72</b> | 71818 | 71486 | 111 | ATG | 66.97 | TonB family protein                           | - | <i>Methylosinus trichosporium</i> OB3b   | TonB family protein                                        | 44% identical over<br>77 aa (8e-09)   |
| <b>P1_73</b> | 72598 | 71885 | 238 | ATG | 66.67 | Conserved hypothetical protein                | - | <i>Methylocystis</i> sp. strain          | Hypothetical protein                                       | 69% identical over                    |

|              |       |       |     |     |       |                                                   |             |                                    |                                             |                    |
|--------------|-------|-------|-----|-----|-------|---------------------------------------------------|-------------|------------------------------------|---------------------------------------------|--------------------|
|              |       |       |     |     |       |                                                   |             | Rockwell                           | Met49242DRAFT_0113                          | 238 aa (1e-95)     |
| <b>P1_74</b> | 73116 | 72598 | 173 | ATG | 65.32 | Biopolymer transport protein                      | -           | <i>Methylocystis</i> sp. strain    | Biopolymer transport                        | 78% identical over |
|              |       |       |     |     |       | ExbD/TolR                                         |             | Rockwell                           | protein ExbD/TolR                           | 147 aa (4e-70)     |
| <b>P1_75</b> | 73750 | 73175 | 192 | ATG | 69.97 | MotA/TolQ/ExbB proton channel                     | -           | <i>Methylocystis</i> sp. strain    | MotA/TolQ/ExbB proton                       | 88% identical over |
|              |       |       |     |     |       |                                                   |             | Rockwell                           | channel                                     | 187 aa (6e-105)    |
| <b>P1_76</b> | 74283 | 75116 | 278 | ATG | 61.99 | Glucose kinase                                    | -           | <i>Bacillus halodurans</i> C-125   | Glucose kinase                              | 31% identical over |
|              |       |       |     |     |       |                                                   |             |                                    |                                             | 224 aa (2e-26)     |
| <b>P1_77</b> | 76601 | 75138 | 488 | ATG | 59.29 | Glucan 1,4-alpha-glucosidase                      | -           | <i>Methylocystis</i> sp. strain    | Glucan 1,4-alpha-                           | 58% identical over |
|              |       |       |     |     |       |                                                   |             | Rockwell                           | glucosidase                                 | 481 aa (0.0)       |
| <b>P1_78</b> | 76858 | 76670 | 63  | GTG | 55.56 | Hypothetical protein                              | -           | -                                  | -                                           | -                  |
| <b>P1_79</b> | 77324 | 76926 | 133 | ATG | 58.4  | ABC transporter domain-containing protein         | -           | <i>Methylocella silvestris</i> BL2 | ABC transporter domain-                     | 50% identical over |
|              |       |       |     |     |       |                                                   |             |                                    | containing protein                          | 68 aa (9e-14)      |
| <b>P1_80</b> | 77527 | 77324 | 68  | ATG | 52.94 | Hypothetical protein                              | -           | -                                  | -                                           | -                  |
| <b>P1_81</b> | 77564 | 79678 | 705 | ATG | 60.47 | Glycoside hydrolase family 3 domain protein       | -           | <i>Methylocystis</i> sp. strain    | Glycoside hydrolase family                  | 64% identical over |
|              |       |       |     |     |       |                                                   |             | Rockwell                           | 3 domain protein                            | 698 aa (0.0)       |
| <b>P1_82</b> | 79908 | 80411 | 168 | GTG | 57.74 | Conserved hypothetical protein                    | -           | <i>Methylocystis</i> sp. strain    | Uncharacterized protein                     | 73% identical over |
|              |       |       |     |     |       |                                                   |             | Rockwell                           |                                             | 44 aa (5e-12)      |
| <b>P1_83</b> | 81597 | 81043 | 185 | GTG | 60.36 | Transposase                                       | -           | <i>Agrobacterium vitis</i> S4      | Transposase                                 | 70% identical over |
|              |       |       |     |     |       |                                                   |             |                                    |                                             | 185 aa (5e-95)     |
| <b>P1_84</b> | 81648 | 82325 | 226 | ATG | 61.21 | Hypothetical protein                              | -           | -                                  | -                                           | -                  |
| <b>P1_85</b> | 82455 | 82685 | 77  | GTG | 53.25 | Hypothetical protein                              | -           | -                                  | -                                           | -                  |
| <b>P1_86</b> | 83057 | 83452 | 132 | TTG | 47.22 | Nickel responsive transcriptional regulator, NikR | <i>nikR</i> | <i>Dickeya dadantii</i> Ech586     | Nickel responsive transcriptional regulator | 42% identical over |
|              |       |       |     |     |       |                                                   |             |                                    | NikR                                        | 129 aa (6e-26)     |
| <b>P1_87</b> | 83604 | 86069 | 822 | ATG | 57.91 | TonB-dependent receptor                           | -           | <i>Methylocystis</i> sp. strain    | TonB-dependent receptor                     | 65% identical over |



|               |        |        |      |     |       |                                                             |              |                                 |                                        |                    |
|---------------|--------|--------|------|-----|-------|-------------------------------------------------------------|--------------|---------------------------------|----------------------------------------|--------------------|
|               |        |        |      |     |       |                                                             |              | Rockwell                        |                                        | 819 aa (0.0)       |
| <b>P1_88</b>  | 86243  | 87643  | 467  | ATG | 61.03 | Outer membrane efflux protein                               | -            | <i>Methylocystis</i> sp. strain | Outer membrane efflux                  | 66% identical over |
|               |        |        |      |     |       |                                                             |              | Rockwell                        | protein                                | 461 aa (0.0)       |
| <b>P1_89</b>  | 87691  | 88938  | 416  | ATG | 58.01 | Efflux transporter, RND family, MFP subunit                 | -            | <i>Methylocystis</i> sp. strain | Efflux transporter, RND                | 66% identical over |
|               |        |        |      |     |       |                                                             |              | Rockwell                        | family, MFP subunit                    | 403 aa (0.0)       |
| <b>P1_90</b>  | 89031  | 92213  | 1061 | ATG | 60.1  | Heavy metal efflux pump, CzcA family                        | -            | <i>Methylocystis</i> sp. strain | Heavy metal efflux pump,               | 88% identical over |
|               |        |        |      |     |       |                                                             |              | Rockwell                        | CzcA family                            | 1044 aa (0.0)      |
| <b>P1_91</b>  | 92351  | 92692  | 114  | ATG | 52.34 | Hypothetical protein                                        | -            | -                               | -                                      | -                  |
| <b>P1_92</b>  | 93523  | 92921  | 201  | GTG | 61.69 | Transposase, IS4 family protein                             | -            | <i>Methylocystis</i> sp. strain | Transposase, IS4 family                | 81% identical over |
|               |        |        |      |     |       |                                                             |              | Rockwell                        | protein                                | 177 aa (4e-96)     |
| <b>P1_93</b>  | 95116  | 93533  | 528  | GTG | 63.51 | Transposase                                                 | -            | <i>Methylocystis</i> sp. strain | Transposase                            | 89% identical over |
|               |        |        |      |     |       |                                                             |              | Rockwell                        |                                        | 523 aa (0.0)       |
| <b>P1_94</b>  | 95507  | 95157  | 117  | ATG | 63.25 | Transposase, IS66 Orf2 family protein                       | -            | <i>Methylocystis</i> sp. strain | Transposase, IS66 Orf2                 | 95% identical over |
|               |        |        |      |     |       |                                                             |              | Rockwell                        | family protein                         | 117 aa (2e-75)     |
| <b>P1_95</b>  | 95716  | 95510  | 69   | GTG | 67.63 | Transposase, IS3/IS911 family protein                       | -            | <i>Methylocystis</i> sp. strain | Transposase, IS3/IS911                 | 61% identical over |
|               |        |        |      |     |       |                                                             |              | Rockwell                        | family protein                         | 69 aa (7e-17)      |
| <b>P1_96</b>  | 96825  | 95842  | 328  | ATG | 64.23 | Transposase, IS4 family protein                             | -            | <i>Methylocystis</i> sp. strain | Transposase, IS4 family                | 81% identical over |
|               |        |        |      |     |       |                                                             |              | Rockwell                        | protein                                | 278 aa (5e-159)    |
| <b>P1_97</b>  | 97950  | 97105  | 282  | GTG | 64.3  | H <sup>+</sup> transporting two-sector ATPase gamma subunit | -            | <i>Methylocystis</i> sp. strain | H <sup>+</sup> transporting two-sector | 40% identical over |
|               |        |        |      |     |       |                                                             |              | Rockwell                        | ATPase gamma subunit                   | 280 aa (8e-52)     |
| <b>P1_98</b>  | 99491  | 97950  | 514  | ATG | 63.81 | ATP synthase F1 sub-complex, alpha 2 subunit                | <i>atpA2</i> | <i>Methylocystis</i> sp. strain | ATP synthase F1, alpha                 | 77% identical over |
|               |        |        |      |     |       |                                                             |              | Rockwell                        | subunit                                | 500 aa (0.0)       |
| <b>P1_99</b>  | 100222 | 99491  | 244  | ATG | 63.52 | ATP synthase F0 sub-complex, B subunit                      | -            | <i>Bradyrhizobium</i> sp. BTAi1 | ATP synthase F0                        | 58% identical over |
|               |        |        |      |     |       |                                                             |              |                                 | subcomplex, B subunit                  | 241 aa (3e-82)     |
| <b>P1_100</b> | 100464 | 100228 | 79   | ATG | 63.29 | ATP synthase F0 sub-complex, C 2                            | <i>atpE2</i> | <i>Bradyrhizobium</i> sp. BTAi1 | ATP synthase F0                        | 88% identical over |

|               |        |        |     |     |       |                                                    |              |                                          |   |                                                                                   |                                    |
|---------------|--------|--------|-----|-----|-------|----------------------------------------------------|--------------|------------------------------------------|---|-----------------------------------------------------------------------------------|------------------------------------|
|               |        |        |     |     |       | subunit                                            |              |                                          |   | subcomplex, C subunit                                                             | 78 aa (3e-34)                      |
| <b>P1_101</b> | 101959 | 100478 | 494 | ATG | 59.11 | ATP synthase F0 sub-complex, A 2 subunit           | <i>atpB2</i> | <i>Methylocystis</i> sp. strain Rockwell |   | ATP synthase F0 subcomplex, A subunit                                             | 60% identical over 490 aa (0.0)    |
| <b>P1_102</b> | 102297 | 102013 | 95  | ATG | 62.46 | Hypothetical protein                               | -            | -                                        | - | -                                                                                 | -                                  |
| <b>P1_103</b> | 102578 | 102297 | 94  | ATG | 64.89 | H <sup>+</sup> transporting ATP synthase protein 1 | -            | <i>Methylocystis</i> sp. strain Rockwell |   | F0F1-ATPase subunit, putative (H <sup>+</sup> transporting ATP synthase protein1) | 67% identical over 89 aa (1e-29)   |
| <b>P1_104</b> | 103027 | 102578 | 150 | ATG | 60.22 | ATP synthase F1 sub-complex, epsilon subunit       | -            | <i>Methylocystis</i> sp. strain Rockwell |   | ATP synthase F1 subcomplex, epsilon subunit                                       | 68% identical over 146 aa (2e-63)  |
| <b>P1_105</b> | 104475 | 103027 | 483 | TTG | 64.46 | ATP synthase F1 sub-complex, beta 2 subunit        | <i>atpD2</i> | <i>Methylocystis</i> sp. strain Rockwell |   | ATP synthase F1 subcomplex, beta subunit                                          | 83% identical over 464 aa (0.0)    |
| <b>P1_106</b> | 104678 | 105940 | 421 | TTG | 58.75 | Conserved hypothetical protein                     | -            | <i>Methylocystis</i> sp. strain Rockwell |   | Hypothetical protein Met49242DRAFT_3945                                           | 80% identical over 421 aa (0.0)    |
| <b>P1_107</b> | 105948 | 106418 | 157 | ATG | 66.03 | Phosphate acetyl/butaryl transferase               | -            | <i>Novosphingobium</i> sp. PP1Y          |   | Phosphate acetyl/butaryl transferase                                              | 60% identical over 150 aa (1e-48)  |
| <b>P1_108</b> | 106427 | 108454 | 676 | ATG | 62.08 | Oxidoreductase FAD/NAD(P)-binding domain protein   |              | <i>Methylocystis</i> sp. strain Rockwell |   | Oxidoreductase FAD/NAD(P)-binding domain protein                                  | 69% identical over 560 aa (0.0)    |
| <b>P1_109</b> | 108461 | 109219 | 253 | ATG | 60.47 | Conserved hypothetical protein                     |              | <i>Methylocystis</i> sp. strain Rockwell |   | Hypothetical protein Met49242DRAFT_3295                                           | 66% identical over 253 aa (4e-104) |
| <b>P1_110</b> | 109219 | 109986 | 256 | ATG | 58.46 | Conserved hypothetical protein                     | -            | <i>Methylocystis</i> sp. strain Rockwell |   | Hypothetical protein Met49242DRAFT_3294                                           | 63% identical over 256 aa (3e-107) |
| <b>P1_111</b> | 110056 | 110400 | 115 | ATG | 57.1  | Hypothetical protein                               | -            | -                                        | - | -                                                                                 | -                                  |
| <b>P1_112</b> | 110841 | 110653 | 63  | GTG | 61.38 | Hypothetical protein                               | -            | -                                        | - | -                                                                                 | -                                  |

|               |        |        |     |     |       |                                             |             |                                                           |                                                         |                                       |
|---------------|--------|--------|-----|-----|-------|---------------------------------------------|-------------|-----------------------------------------------------------|---------------------------------------------------------|---------------------------------------|
| <b>P1_113</b> | 111161 | 110841 | 107 | TTG | 65.11 | Beta-glucosidase                            | -           | <i>Methylocystis</i> sp. strain<br>Rockwell               | Beta-glucosidase                                        | 57% identical over<br>84 aa (1e-15)   |
| <b>P1_114</b> | 112329 | 111406 | 308 | ATG | 60.17 | Fructose-bisphosphate aldolase,<br>class I  | <i>fbaB</i> | <i>Rhodospirillum centenum</i><br>SW                      | Fructose-bisphosphate<br>aldolase, class I              | 74% identical over<br>307 aa (1e-171) |
| <b>P1_115</b> | 112589 | 112783 | 65  | GTG | 53.85 | Hypothetical protein                        | -           | -                                                         | -                                                       | -                                     |
| <b>P1_116</b> | 114112 | 113732 | 127 | ATG | 59.58 | Conserved hypothetical protein              | -           | <i>Methylosinus trichosporium</i><br>OB3b                 | Hypothetical protein<br>MettrDRAFT_3909                 | 48% identical over<br>71 aa (4e-15)   |
| <b>P1_117</b> | 114498 | 114289 | 70  | GTG | 60.0  | Transposase                                 | -           | <i>Methylosinus trichosporium</i><br>OB3b                 | Transposase and inactivated<br>derivatives-like protein | 57% identical over<br>42 aa (1e-06)   |
| <b>P1_118</b> | 115733 | 115071 | 221 | GTG | 56.56 | Conserved hypothetical protein              | -           | <i>Burkholderia vietnamiensis</i><br>G4                   | Conserved hypothetical<br>protein                       | 76% identical over<br>219 aa (2e-120) |
| <b>P1_119</b> | 116052 | 115765 | 96  | ATG | 57.64 | Conserved hypothetical protein              | -           | <i>Burkholderia vietnamiensis</i><br>G4                   | Conserved hypothetical<br>protein                       | 58% identical over<br>82 aa (3e-25)   |
| <b>P1_120</b> | 117156 | 116095 | 354 | ATG | 61.11 | Copper-translocating P-type<br>ATPase       | -           | <i>Thermaerobacter</i><br><i>marianensis</i><br>DSM 12885 | Copper-translocating P-type<br>ATPase                   | 65% identical over<br>120 aa (7e-53)  |
| <b>P1_121</b> | 119699 | 117156 | 848 | TTG | 61.4  | Copper-translocating P-type<br>ATPase       | <i>actP</i> | <i>Thermaerobacter</i><br><i>marianensis</i><br>DSM 12885 | Copper-translocating P-type<br>ATPase                   | 64% identical over<br>825 aa (0.0)    |
| <b>P1_122</b> | 120245 | 119751 | 165 | GTG | 58.79 | Predicted metal-binding protein             | -           | <i>Hahella chejuensis</i> KCTC<br>2396                    | Predicted metal-binding<br>protein                      | 47% identical over<br>147 aa (1e-48)  |
| <b>P1_123</b> | 120757 | 120398 | 120 | ATG | 61.67 | Periplasmic copper-binding protein,<br>CusF | -           | <i>Methylocystis</i> sp. strain<br>Rockwell               | Periplasmic copper-binding<br>protein                   | 53% identical over<br>110 aa (2e-32)  |
| <b>P1_124</b> | 121057 | 120872 | 62  | ATG | 60.22 | Heavy metal efflux pump, CzcA<br>family     | -           | <i>Magnetospirillum</i><br><i>magnetotacticum</i> MS-1    | Heavy metal efflux pump,<br>CzcA family                 | 76% identical over<br>46 aa (4e-12)   |

|               |        |        |      |     |       |                                                   |   |                                          |                                                                |                                    |
|---------------|--------|--------|------|-----|-------|---------------------------------------------------|---|------------------------------------------|----------------------------------------------------------------|------------------------------------|
| <b>P1_125</b> | 124601 | 121443 | 1053 | GTG | 60.34 | Heavy metal efflux pump, CzcA family              | - | <i>Methylocystis</i> sp. strain Rockwell | Heavy metal efflux pump, CzcA family                           | 86% identical over 1040 aa (0.0)   |
| <b>P1_126</b> | 126019 | 124601 | 473  | ATG | 61.59 | Efflux transporter, RND family, MFP subunit       | - | <i>Methylocystis</i> sp. strain Rockwell | Efflux transporter, RND family, MFP subunit                    | 67% identical over 473 aa (0.0)    |
| <b>P1_127</b> | 126903 | 126019 | 295  | GTG | 63.16 | Outer membrane efflux protein                     | - | <i>Methylocystis</i> sp. strain Rockwell | Outer membrane efflux protein                                  | 73% identical over 154 aa (7e-70)  |
| <b>P1_128</b> | 127313 | 126909 | 135  | ATG | 59.26 | Conserved hypothetical protein                    | - | <i>Methylocystis</i> sp. strain Rockwell | Hypothetical protein Met49242DRAFT_3930                        | 67% identical over 119 aa (1e-49)  |
| <b>P1_129</b> | 127512 | 127321 | 64   | GTG | 59.9  | Hypothetical protein                              | - | -                                        | -                                                              | -                                  |
| <b>P1_130</b> | 127994 | 127545 | 150  | ATG | 61.11 | Putative periplasmic copper-binding protein, CusF | - | <i>Methylobacterium extorquens</i> DM4   | Putative periplasmic copper-binding protein (cusF-like domain) | 48% identical over 83 aa (8e-20)   |
| <b>P1_131</b> | 128602 | 128378 | 75   | ATG | 59.56 | Hypothetical protein                              | - | -                                        | -                                                              | -                                  |
| <b>P1_132</b> | 129085 | 129558 | 158  | ATG | 59.92 | Methyltransferase type 11                         | - | <i>Methylocystis</i> sp. strain Rockwell | Methyltransferase type 11                                      | 81% identical over 149 aa (5e-84)  |
| <b>P1_133</b> | 129671 | 130885 | 405  | GTG | 53.5  | Glycoside hydrolase family 1                      | - | <i>Methylocystis</i> sp. strain Rockwell | Glycoside hydrolase family 1                                   | 94% identical over 405 aa (0.0)    |
| <b>P1_134</b> | 130928 | 131725 | 266  | GTG | 53.26 | Conserved hypothetical protein                    | - | <i>Methylocystis</i> sp. strain Rockwell | Protein of unknown function DUF344                             | 80% identical over 251 aa (1e-156) |
| <b>P1_135</b> | 133712 | 131796 | 639  | ATG | 59.1  | Conserved hypothetical protein                    | - | <i>Alicyclophilus denitrificans</i> BC   | Hypothetical protein Alide_2732                                | 70% identical over 572 aa (0.0)    |
| <b>P1_136</b> | 134173 | 133712 | 154  | ATG | 56.71 | Conserved hypothetical protein                    | - | <i>Methylocystis</i> sp. strain Rockwell | Hypothetical protein Met49242DRAFT_4004                        | 42% identical over 115 aa (6e-19)  |
| <b>P1_137</b> | 134853 | 134245 | 203  | ATG | 53.2  | Cytochrome C class I protein                      | - | <i>Rhodospseudomonas palustris</i> TIE-1 | Cytochrome C class I protein                                   | 50% identical over 154 aa (7e-48)  |

|               |        |        |      |     |       |                                                                             |   |                                             |                                                                             |                                       |
|---------------|--------|--------|------|-----|-------|-----------------------------------------------------------------------------|---|---------------------------------------------|-----------------------------------------------------------------------------|---------------------------------------|
| <b>P1_138</b> | 135083 | 135466 | 128  | ATG | 61.46 | Transposase, resolvase domain-containing protein                            | - | <i>Vibrio furnissii</i> CIP 102972          | Resolvase domain-containing protein                                         | 42% identical over<br>62 aa (1e-07)   |
| <b>P1_139</b> | 136332 | 136096 | 79   | GTG | 60.76 | Transposase, integrase catalytic subunit                                    | - | <i>Geobacter uraniireducens</i><br>Rf4      | Integrase catalytic subunit                                                 | 51% identical over<br>42 aa (0.011)   |
| <b>P1_140</b> | 136664 | 136356 | 103  | TTG | 59.87 | Glycoside hydrolase family 3 domain containing protein                      | - | <i>Methylocystis</i> sp. strain<br>Rockwell | Glycoside hydrolase family 3 domain containing protein                      | 75% identical over<br>77 aa (5e-29)   |
| <b>P1_141</b> | 137062 | 136664 | 133  | ATG | 58.9  | Glycoside hydrolase family 3 domain containing protein                      | - | <i>Methylocystis</i> sp. strain<br>Rockwell | Glycoside hydrolase family 3 domain containing protein                      | 59% identical over<br>78 aa (5e-20)   |
| <b>P1_142</b> | 137361 | 139184 | 608  | ATG | 58.99 | ABC transporter domain-containing protein                                   | - | <i>Methylocystis</i> sp. strain<br>Rockwell | ABC transporter domain-containing protein                                   | 72% identical over<br>593 aa (0.0)    |
| <b>P1_143</b> | 139230 | 140663 | 478  | ATG | 58.58 | Conserved hypothetical protein                                              | - | <i>Methylocystis</i> sp. strain<br>Rockwell | Hypothetical protein<br>Met49242DRAFT_3939                                  | 73% identical over<br>465 aa (0.0)    |
| <b>P1_144</b> | 141980 | 140961 | 340  | ATG | 58.33 | D-isomer specific 2-hydroxyacid dehydrogenase, NAD-binding catalytic domain | - | <i>Methylocystis</i> sp. strain<br>Rockwell | D-isomer specific 2-hydroxyacid dehydrogenase, NAD-binding catalytic domain | 64% identical over<br>332 aa (8e-159) |
| <b>P1_145</b> | 144552 | 142150 | 801  | ATG | 60.84 | Phosphoenolpyruvate synthase                                                | - | <i>Methylosinus trichosporium</i><br>OB3b   | Phosphoenolpyruvate synthase                                                | 81% identical over<br>787 aa (0.0)    |
| <b>P1_146</b> | 145068 | 144805 | 88   | GTG | 52.65 | Conserved hypothetical protein                                              | - | <i>Halothiobacillus neapolitanus</i><br>c2  | Hypothetical protein<br>Hneap_0972                                          | 61% identical over<br>87 aa (3e-27)   |
| <b>P1_147</b> | 145263 | 148550 | 1096 | GTG | 58.88 | Conserved hypothetical protein                                              | - | <i>Methylocystis</i> sp. strain<br>Rockwell | Hypothetical protein<br>Met49242DRAFT_3848                                  | 68% identical over<br>1077 aa (0.0)   |
| <b>P1_148</b> | 148873 | 149061 | 63   | TTG | 58.73 | Conserved hypothetical protein                                              | - | <i>Agrobacterium rhizogenes</i>             | Uncharacterized protein                                                     | 59% identical over<br>61 aa (2e-16)   |

|               |        |        |     |     |       |                                                                |             |                                                                    |                                                                |                                    |
|---------------|--------|--------|-----|-----|-------|----------------------------------------------------------------|-------------|--------------------------------------------------------------------|----------------------------------------------------------------|------------------------------------|
| <b>P1_149</b> | 150200 | 150583 | 128 | ATG | 59.9  | Single-strand binding protein/primosomal replication protein n | -           | <i>Nitrobacter hamburgensis</i> X14                                | Single-strand binding protein/primosomal replication protein n | 49% identical over 104 aa (5e-33)  |
| <b>P1_150</b> | 150742 | 150996 | 85  | TTG | 58.43 | Hypothetical protein                                           | -           | -                                                                  | -                                                              | -                                  |
| <b>P1_151</b> | 151691 | 151278 | 138 | GTG | 63.04 | Phosphoenolpyruvate synthase                                   | -           | <i>Methylosinus trichosporium</i> OB3b                             | Phosphoenolpyruvate synthase                                   | 80% identical over 117 aa (4e-59)  |
| <b>P1_152</b> | 152274 | 151714 | 187 | ATG | 61.5  | Hypothetical protein                                           | -           | -                                                                  | -                                                              | -                                  |
| <b>P1_153</b> | 153933 | 152281 | 551 | ATG | 65.64 | Mercuric reductase, MerA                                       | <i>merA</i> | <i>Salmonella enterica</i> subsp. <i>enterica</i> serovar Kentucky | Mercuric reductase, MerA                                       | 78% identical over 551 aa (0.0)    |
| <b>P1_154</b> | 154389 | 154114 | 92  | ATG | 57.61 | Mercuric ion transport protein periplasmic component, MerP     | <i>merP</i> | <i>Pseudomonas</i> sp.                                             | Mercuric transport protein periplasmic component, MerP         | 73% identical over 92 aa (1e-41)   |
| <b>P1_155</b> | 154811 | 154410 | 134 | ATG | 66.17 | Mercuric ion transport protein, MerT                           | <i>merT</i> | <i>Methylocystis</i> sp. strain Rockwell                           | Mercuric transport protein, MerT                               | 74% identical over 134 aa (5e-65)  |
| <b>P1_156</b> | 155101 | 155577 | 159 | ATG | 59.96 | Mercuric ion resistance operon regulatory protein, MerR        | <i>merR</i> | <i>Methylocystis</i> sp. strain Rockwell                           | Mercuric resistance operon regulatory protein, MerR            | 82% identical over 153 aa (1e-85)  |
| <b>P1_157</b> | 155626 | 155904 | 93  | ATG | 60.93 | Hypothetical protein                                           | -           | -                                                                  | -                                                              | -                                  |
| <b>P1_158</b> | 155923 | 157029 | 369 | ATG | 58.81 | Predicted aminopeptidase                                       | -           | NC10 bacterium 'Dutch sediment'                                    | Predicted aminopeptidase                                       | 67% identical over 290 aa (3e-130) |
| <b>P1_159</b> | 157412 | 157086 | 109 | ATG | 66.67 | Putative pyruvate formate lyase-activating enzyme              | -           | <i>Endoriftia persephone</i>                                       | Putative pyruvate formate lyase-activating enzyme              | 54% identical over 100 aa (1e-33)  |
| <b>P1_160</b> | 157617 | 159152 | 512 | ATG | 64.58 | Transposase, integrase catalytic region                        | -           | <i>Methylobacterium chloromethanicum</i> CM4                       | Integrase catalytic region                                     | 71% identical over 512 aa (0.0)    |
| <b>P1_161</b> | 159792 | 159196 | 199 | ATG | 65.66 | Conserved hypothetical protein                                 | -           | <i>Bradyrhizobium</i> sp. BTAi1                                    | Uncharacterized protein                                        | 44% identical over 195 aa (3e-42)  |

|               |        |        |     |     |       |                                                       |   |                                                |                                                       |                                    |
|---------------|--------|--------|-----|-----|-------|-------------------------------------------------------|---|------------------------------------------------|-------------------------------------------------------|------------------------------------|
| <b>P1_162</b> | 160868 | 159768 | 367 | ATG | 59.58 | Radical SAM domain-containing protein                 | - | <i>Methylobacterium nodulans</i> ORS 2060      | Radical SAM domain-containing protein                 | 75% identical over 257 aa (1e-143) |
| <b>P1_163</b> | 160903 | 161892 | 330 | ATG | 62.32 | Radical SAM domain-containing protein                 | - | <i>Chloroherpeton thalassium</i> ATCC 35110    | Radical SAM domain-containing protein                 | 58% identical over 293 aa (2e-124) |
| <b>P1_164</b> | 161918 | 162310 | 131 | ATG | 58.78 | Conserved hypothetical protein                        | - | <i>Xenorhabdus bovienii</i> SS-2004            | Sea14                                                 | 63% identical over 46 aa (4e-12)   |
| <b>P1_165</b> | 162614 | 162441 | 58  | TTG | 62.07 | Transposase                                           | - | <i>Magnetospirillum magnetotacticum</i> MS-1   | Transposase and inactivated derivatives               | 59% identical over 51 aa (4e-13)   |
| <b>P1_166</b> | 163477 | 162638 | 280 | ATG | 59.17 | Transposase, IS116/IS110 /IS902 family protein        | - | <i>Acidiphilium cryptum</i> JF-5               | Transposase, IS116/IS110 /IS902 family protein        | 66% identical over 236 aa (4e-110) |
| <b>P1_167</b> | 164357 | 163905 | 151 | ATG | 59.38 | Periplasmic copper-binding protein, CusF              | - | <i>Methylobacterium extorquens</i> DM4         | Periplasmic copper-binding protein                    | 54% identical over 78 aa (1e-24)   |
| <b>P1_168</b> | 164488 | 164913 | 142 | ATG | 62.44 | 2-oxo-acid dehydrogenase E1 subunit, homodimeric type | - | <i>Hyphomicrobium denitrificans</i> ATCC 51888 | 2-oxo-acid dehydrogenase E1 subunit, homodimeric type | 33% identical over 89 aa (0.48)    |
| <b>P1_169</b> | 165113 | 165739 | 209 | ATG | 63.0  | Ubiquinol-cytochrome c reductase, iron-sulfur subunit | - | <i>Nitrobacter hamburgensis</i> X14            | Ubiquinol-cytochrome c reductase, iron-sulfur subunit | 59% identical over 202 aa (9e-91)  |
| <b>P1_170</b> | 165842 | 165991 | 50  | ATG | 60.0  | Hypothetical protein                                  | - | No significant homology                        | -                                                     | -                                  |
| <b>P1_171</b> | 166202 | 166480 | 93  | ATG | 62.72 | Conserved hypothetical protein                        | - | <i>Afiplia</i> sp. 1NLS2                       | Hypothetical protein AfiDRAFT                         | 49% identical over 60 aa (2e-11)   |
| <b>P1_172</b> | 166639 | 167274 | 212 | ATG | 54.72 | Conserved hypothetical protein                        | - | <i>Nitrobacter hamburgensis</i> X14            | Conserved hypothetical protein                        | 69% identical over 204 aa (1e-92)  |
| <b>P1_173</b> | 168828 | 167422 | 469 | GTG | 63.18 | Type I secretion outer membrane                       | - | <i>Methylocystis</i> sp. strain                | Type I secretion outer                                | 72% identical over                 |

|               |        |        |      |     |       |                                                                |   |                                              |                                                                |                                       |
|---------------|--------|--------|------|-----|-------|----------------------------------------------------------------|---|----------------------------------------------|----------------------------------------------------------------|---------------------------------------|
|               |        |        |      |     |       | protein, TolC family                                           |   | Rockwell                                     | membrane protein, TolC family                                  | 465 aa (0.0)                          |
| <b>P1_174</b> | 172055 | 168828 | 1076 | ATG | 62.48 | Heavy metal efflux pump, CzcA family                           | - | <i>Methylocystis</i> sp. strain<br>Rockwell  | Heavy metal efflux pump, CzcA family                           | 81% identical over<br>1076 aa (0.0)   |
| <b>P1_175</b> | 173369 | 172071 | 433  | ATG | 63.43 | Efflux transporter, RND family, MFP subunit                    | - | <i>Methylocystis</i> sp. strain<br>Rockwell  | Efflux transporter, RND family, MFP subunit                    | 65% identical over<br>397 aa (3e-171) |
| <b>P1_176</b> | 173547 | 173873 | 109  | ATG | 59.02 | Conserved hypothetical protein                                 | - | <i>Alicyclophilus denitrificans</i><br>BC    | Propeptide pepsy amd peptidase m4                              | 37% identical over<br>104 aa (3e-15)  |
| <b>P1_177</b> | 173876 | 174535 | 220  | ATG | 58.79 | Two component transcriptional regulator, winged helix family   | - | <i>Methylobacterium nodulans</i><br>ORS 2060 | Two component transcriptional regulator, winged helix family   | 66% identical over<br>216 aa (6e-105) |
| <b>P1_178</b> | 174535 | 175917 | 461  | ATG | 60.45 | Integral membrane sensor signal transduction histidine kinase  | - | <i>Allochromatium vinosum</i><br>DSM 180     | Integral membrane sensor signal transduction histidine kinase  | 45% identical over<br>434 aa (5e-108) |
| <b>P1_179</b> | 178933 | 175982 | 984  | ATG | 64.06 | Heavy metal translocating P-type ATPase                        | - | <i>Mesorhizobium</i> sp. BNC1                | Heavy metal translocating P-type ATPase                        | 60% identical over<br>729 aa (0.0)    |
| <b>P1_180</b> | 179571 | 179954 | 128  | ATG | 59.9  | Single-strand binding protein/primosomal replication protein n |   | <i>Nitrobacter hamburgensis</i><br>X14       | Single-strand binding protein/primosomal replication protein n | 51% identical over<br>104 aa (3e-34)  |
| <b>P1_181</b> | 180915 | 180649 | 89   | GTG | 62.92 | Efflux transporter, RND family, MFP subunit                    | - | <i>Methylocystis</i> sp. strain<br>Rockwell  | Efflux transporter, RND family, MFP subunit                    | 40% identical over<br>51 aa (0.067)   |
| <b>P1_182</b> | 181087 | 181329 | 81   | ATG | 58.85 | Transposase, mutator type                                      | - | alphaproteobacterium<br>BAL199               | Transposase, mutator type                                      | 91% identical over<br>43 aa (5e-17)   |
| <b>P1_183</b> | 181761 | 181348 | 138  | ATG | 57.0  | Conserved hypothetical protein                                 | - | <i>Methylocystis</i> sp. strain<br>Rockwell  | Hypothetical protein<br>Met49242DRAFT_3306                     | 44% identical over<br>93 aa (3e-21)   |



|               |        |        |     |     |       |                                                                |   |                                          |                                                                |                                       |
|---------------|--------|--------|-----|-----|-------|----------------------------------------------------------------|---|------------------------------------------|----------------------------------------------------------------|---------------------------------------|
| <b>P1_184</b> | 183302 | 182229 | 358 | TTG | 63.69 | Conserved hypothetical protein                                 | - | <i>Mesorhizobium loti</i>                | Hypothetical protein                                           | 36% identical over                    |
|               |        |        |     |     |       |                                                                |   | MAFF303099                               | ml19238                                                        | 246 aa (2e-38)                        |
| <b>P1_185</b> | 183352 | 183537 | 62  | GTG | 56.45 | Hypothetical protein                                           | - | No significant homology                  | -                                                              | -                                     |
| <b>P1_186</b> | 183620 | 183967 | 116 | ATG | 54.6  | Single-strand binding protein/primosomal replication protein n | - | <i>Methylocystis</i> sp. strain Rockwell | Single-strand binding protein/primosomal replication protein n | 59% identical over<br>111 aa (9e-46)  |
| <b>P1_187</b> | 184014 | 184235 | 74  | GTG | 59.01 | Hypothetical protein                                           | - | No significant homology                  | -                                                              | -                                     |
| <b>P1_188</b> | 184578 | 184345 | 78  | ATG | 59.83 | Hypothetical protein                                           | - | No significant homology                  | -                                                              | -                                     |
| <b>P1_189</b> | 184797 | 185066 | 90  | GTG | 60.0  | Conserved hypothetical protein                                 | - | <i>Rhodopseudomonas palustris</i> DX-1   | Hypothetical protein Rpx1_3305                                 | 60% identical over<br>82 aa (1e-26)   |
| <b>P1_190</b> | 185321 | 185097 | 75  | ATG | 58.22 | Conserved hypothetical protein                                 | - | <i>Methylosinus trichosporium</i> OB3b   | Hypothetical protein MettrDRAFT_3909                           | 32% identical over<br>67 aa (1.0)     |
| <b>P1_191</b> | 185587 | 185321 | 89  | GTG | 61.42 | Hypothetical protein                                           | - | No significant homology                  | -                                                              | -                                     |
| <b>P1_192</b> | 185630 | 186373 | 248 | GTG | 61.56 | Single-strand binding protein/primosomal replication protein n | - | <i>Methylocystis</i> sp. strain Rockwell | Single-strand binding protein/primosomal replication protein n | 48% identical over<br>125 aa (9e-29)  |
| <b>P1_193</b> | 187190 | 186606 | 195 | ATG | 60.34 | Conserved hypothetical protein                                 | - | <i>Methylocystis</i> sp. strain Rockwell | Hypothetical protein Met49242DRAFT_3576                        | 66% identical over<br>188 aa (3e-85)  |
| <b>P1_194</b> | 187310 | 187522 | 71  | ATG | 56.34 | Conserved hypothetical protein                                 | - | <i>Caulobacter</i> sp. K31               | Hypothetical protein Caul_2262                                 | 55% identical over<br>56 aa (3e-13)   |
| <b>P1_195</b> | 187518 | 188660 | 381 | ATG | 57.92 | DNA-cytosine methyltransferase                                 | - | <i>Methylocystis</i> sp. strain Rockwell | DNA-cytosine methyltransferase                                 | 82% identical over<br>381 aa (0.0)    |
| <b>P1_196</b> | 188660 | 189514 | 285 | GTG | 58.6  | Conserved hypothetical protein                                 | - | <i>Methylocystis</i> sp. strain Rockwell | Hypothetical protein Met49242DRAFT_3578                        | 78% identical over<br>283 aa (2e-167) |
| <b>P1_197</b> | 189510 | 190241 | 244 | ATG | 57.24 | Excinuclease ABC C subunit                                     | - | <i>Methylocystis</i> sp. strain          | Excinuclease ABC C                                             | 83% identical over                    |

|               |        |        |     |     |       |                                                                                   |             |                                                         |                                                                                   |                                    |
|---------------|--------|--------|-----|-----|-------|-----------------------------------------------------------------------------------|-------------|---------------------------------------------------------|-----------------------------------------------------------------------------------|------------------------------------|
|               |        |        |     |     |       | domain protein                                                                    |             | Rockwell                                                | subunit domain protein                                                            | 233 aa (3e-139)                    |
| <b>P1_198</b> | 190275 | 190535 | 87  | GTG | 57.47 | Hypothetical protein                                                              | -           | -                                                       | -                                                                                 | -                                  |
| <b>P1_199</b> | 190529 | 191257 | 243 | GTG | 64.88 | Phosphatidylserine/phosphatidylglycerophosphate/cardiolipin synthase-like protein | -           | <i>Methylosinus trichosporium</i> OB3b                  | Phosphatidylserine/phosphatidylglycerophosphate/cardiolipin synthase-like protein | 61% identical over 210 aa (2e-83)  |
| <b>P1_200</b> | 191762 | 191349 | 138 | ATG | 67.39 | Mobilization protein, MobE                                                        | <i>mobE</i> | <i>Acidithiobacillus ferrooxidans</i> , plasmid pTF-FC2 | Mobilization protein, MobE                                                        | 48% identical over 122 aa (3e-23)  |
| <b>P1_201</b> | 192453 | 191770 | 228 | ATG | 59.21 | Mobilization protein, MobD                                                        | <i>mobD</i> | <i>Pseudomonas aeruginosa</i>                           | Mobilization protein, MobD                                                        | 64% identical over 225 aa (2e-100) |
| <b>P1_202</b> | 192863 | 192468 | 132 | ATG | 59.09 | Conserved hypothetical protein                                                    | -           | <i>Desulfovibrio</i> sp. 3_1_syn3                       | Conserved hypothetical protein                                                    | 29% identical over 124 aa (3e-06)  |
| <b>P1_203</b> | 193281 | 193685 | 135 | ATG | 60.99 | Mobilization protein, MobC                                                        | <i>mobC</i> | <i>Methylocystis</i> sp. strain Rockwell                | Mobilization protein, MobC                                                        | 50% identical over 129 aa (2e-34)  |
| <b>P1_204</b> | 193685 | 196648 | 988 | ATG | 65.86 | Conserved hypothetical protein                                                    | -           | <i>Methylocystis</i> sp. strain Rockwell                | Hypothetical protein Met49242DRAFT_3318                                           | 50% identical over 987 aa (0.0)    |
| <b>P1_205</b> | 198012 | 196984 | 343 | ATG | 61.61 | Transposase, IS116/IS110/IS902 family protein                                     | -           | <i>Nitrobacter hamburgensis</i> X14                     | Transposase, IS116/IS110/IS902 family protein                                     | 90% identical over 343 aa (0.0)    |
| <b>P1_206</b> | 198443 | 198721 | 93  | ATG | 62.72 | Addiction module antidote protein, CopG/Arc/MetJ/RelE family                      | -           | <i>Starkeya novella</i> DSM 506                         | Addiction module antidote protein, CopG/Arc/MetJ family                           | 63% identical over 93 aa (8e-38)   |
| <b>P1_207</b> | 198721 | 199017 | 99  | GTG | 62.63 | Toxin-antitoxin system, toxin component, RelE family                              | -           | <i>Roseibium</i> sp. TrichSKD4                          | Toxin-antitoxin system, toxin component, RelE family                              | 56% identical over 96 aa (2e-29)   |
| <b>P1_208</b> | 199458 | 199159 | 100 | ATG | 63.33 | Conserved hypothetical protein                                                    | -           | <i>Streptomyces cattleya</i>                            | Conserved exported protein                                                        | 36% identical over                 |

|               |        |        |     |     |       |                                                               |               |                                               |                                                               |                                    |
|---------------|--------|--------|-----|-----|-------|---------------------------------------------------------------|---------------|-----------------------------------------------|---------------------------------------------------------------|------------------------------------|
|               |        |        |     |     |       |                                                               |               | NRRL 8057                                     | of unknown function                                           | 82 aa (3e-08)                      |
| <b>P1_209</b> | 199603 | 200106 | 168 | ATG | 54.76 | Invasion associated locus B family protein                    | -             | <i>Methylosinus trichosporium</i> OB3b        | Invasion associated locus B family protein                    | 36% identical over 150 aa (5e-28)  |
| <b>P1_210</b> | 200125 | 200802 | 226 | ATG | 60.62 | Conserved hypothetical protein                                | -             | <i>Methylosinus trichosporium</i> OB3b        | Protein of unknown function DUF159                            | 64% identical over 220 aa (1e-95)  |
| <b>P1_211</b> | 200923 | 201141 | 73  | ATG | 61.64 | Hypothetical protein                                          | -             | No significant homology                       | -                                                             | -                                  |
| <b>P1_212</b> | 201922 | 201242 | 227 | ATG | 58.44 | Conserved hypothetical protein                                | -             | <i>Roseobacter</i> sp. MED193                 | Hypothetical protein MED193_00415                             | 37% identical over 216 aa (1e-33)  |
| <b>P1_213</b> | 202880 | 201978 | 301 | ATG | 58.03 | Putative transcriptional regulator                            | -             | <i>Brevundimonas diminuta</i> ATCC 11568      | Putative transcriptional regulator                            | 64% identical over 297 aa (1e-131) |
| <b>P1_214</b> | 203016 | 204161 | 382 | ATG | 63.53 | Patatin-like phospholipase                                    | -             | <i>Gluconacetobacter diazotrophicus</i> PA1 5 | Patatin-like phospholipase                                    | 87% identical over 382 aa (0.0)    |
| <b>P1_215</b> | 204168 | 205211 | 348 | ATG | 63.12 | Conserved hypothetical protein                                | -             | <i>Paracoccus denitrificans</i> SD1           | Hypothetical protein PDI_0629                                 | 86% identical over 324 aa (0.0)    |
| <b>P1_216</b> | 205207 | 207042 | 612 | ATG | 65.47 | Putative ubiquitin-activating protein                         | -             | <i>Gluconacetobacter diazotrophicus</i> PA1 5 | Putative ubiquitin-activating protein                         | 79% identical over 585 aa (0.0)    |
| <b>P1_217</b> | 207071 | 207265 | 65  | ATG | 61.03 | Hypothetical protein                                          | -             | No significant homology                       | -                                                             | -                                  |
| <b>P1_218</b> | 207499 | 208395 | 299 | ATG | 62.99 | Peptidase M, neutral zinc metallopeptidase, zinc-binding site | -             | <i>Polymorphum gilvum</i> SL003B-26A1         | Peptidase M, neutral zinc metallopeptidase, zinc-binding site | 59% identical over 289 aa (9e-120) |
| <b>P1_219</b> | 210882 | 208471 | 804 | ATG | 63.14 | Plasmid conjugal transfer protein, TraG family                | <i>traG</i>   | <i>Methylocystis</i> sp. strain Rockwell      | TraG family protein                                           | 60% identical over 793 aa (0.0)    |
| <b>P1_220</b> | 211971 | 210901 | 357 | ATG | 62.0  | P-type DNA transfer ATPase, VirB11                            | <i>virB11</i> | <i>Methylocystis</i> sp. strain Rockwell      | P-type DNA transfer ATPase VirB11                             | 77% identical over 351 aa (0.0)    |
| <b>P1_221</b> | 213190 | 211952 | 413 | ATG | 61.74 | Plasmid conjugal transfer protein,                            | <i>virB10</i> | <i>Methylocystis</i> sp. strain               | Conjugation TrbI family                                       | 64% identical over                 |

|               |        |        |     |     |       |                                    |              |                                 |                             |                    |
|---------------|--------|--------|-----|-----|-------|------------------------------------|--------------|---------------------------------|-----------------------------|--------------------|
|               |        |        |     |     |       | TrbI/VirB10                        |              | Rockwell                        | protein                     | 413 aa (2e-176)    |
| <b>P1_222</b> | 214055 | 213210 | 846 | ATG | 60.4  | Plasmid conjugal transfer protein, | <i>virB9</i> | <i>Methylocystis</i> sp. strain | Conjugal transfer protein   | 63% identical over |
|               |        |        |     |     |       | TrbG/VirB9                         |              | Rockwell                        | TrbG/VirB9                  | 265 aa (4e-111)    |
| <b>P1_223</b> | 214843 | 214055 | 263 | ATG | 61.6  | Plasmid conjugal transfer protein, | <i>virB8</i> | <i>Methylocystis</i> sp. strain | Type IV secretion protein   | 71% identical over |
|               |        |        |     |     |       | TrbF/VirB8                         |              | Rockwell                        |                             | 248 aa (4e-116)    |
| <b>P1_224</b> | 215943 | 214852 | 364 | ATG | 61.72 | Plasmid conjugal transfer protein, | <i>virB6</i> | <i>Methylocystis</i> sp. strain | TrbL/VirB6 plasmid          | 63% identical over |
|               |        |        |     |     |       | TrbL/VirB6                         |              | Rockwell                        | conjugal transfer protein   | 361aa (7e-151)     |
| <b>P1_225</b> | 216858 | 216145 | 238 | ATG | 61.76 | Plasmid conjugal transfer protein, | <i>virB5</i> | <i>Methylocystis</i> sp. strain | Hypothetical protein        | 76% identical over |
|               |        |        |     |     |       | TrbJ/VirB5                         |              | Rockwell                        | Met49242DRAFT_3564          | 218 aa (1e-70)     |
|               |        |        |     |     |       |                                    |              |                                 | (conjugal transfer protein) |                    |
| <b>P1_226</b> | 217539 | 216874 | 222 | ATG | 62.76 | Conserved hypothetical protein     | -            | <i>Methylocystis</i> sp. strain | Hypothetical protein        | 49% identical over |
|               |        |        |     |     |       |                                    |              | Rockwell                        | Met49242DRAFT_3565          | 214 aa (1e-49)     |
| <b>P1_227</b> | 219964 | 217532 | 811 | GTG | 60.3  | Plasmid conjugal transfer ATPase,  | <i>virB4</i> | <i>Methylocystis</i> sp. strain | Type IV secretion/conjugal  | 82% identical over |
|               |        |        |     |     |       | TrbE/VirB4                         |              | Rockwell                        | transfer ATPase, VirB4      | 811 aa (0.0)       |
|               |        |        |     |     |       |                                    |              |                                 | family                      |                    |
| <b>P1_228</b> | 220264 | 219977 | 96  | ATG | 55.21 | Plasmid conjugal transfer protein, | <i>virB3</i> | <i>Methylocystis</i> sp. strain | Type IV secretory pathway   | 86% identical over |
|               |        |        |     |     |       | TrbD/VirB3                         |              | Rockwell                        | VirB3 family protein        | 92 aa (7e-54)      |
| <b>P1_229</b> | 220581 | 220267 | 105 | ATG | 62.22 | Plasmid conjugal transfer protein, | <i>virB2</i> | <i>Methylocystis</i> sp. strain | Conjugal transfer protein   | 70% identical over |
|               |        |        |     |     |       | TrbC/VirB2                         |              | Rockwell                        | TrbC                        | 103 aa (4e-34)     |
| <b>P1_230</b> | 221422 | 220568 | 285 | ATG | 62.69 | Plasmid conjugal transfer protein, | <i>virB1</i> | <i>Methylocystis</i> sp. strain | Lytic transglycosylase      | 57% identical over |
|               |        |        |     |     |       | TrbB/VirB1                         |              | Rockwell                        | catalytic                   | 194 aa (5e-65)     |
| <b>P1_231</b> | 221470 | 221898 | 143 | TTG | 55.94 | Conserved hypothetical protein     | -            | <i>Methylocystis</i> sp. strain | Hypothetical protein        | 46% identical over |
|               |        |        |     |     |       |                                    |              | Rockwell                        | Met49242DRAFT_3570          | 69 aa (1e-09)      |
| <b>P1_232</b> | 221898 | 222512 | 205 | ATG | 60.81 | Conserved hypothetical protein     | -            | <i>Methylocystis</i> sp. strain | Hypothetical protein        | 60% identical over |
|               |        |        |     |     |       |                                    |              | Rockwell                        | Met49242DRAFT_4335          | 197 aa (2e-78)     |

|               |        |        |     |     |       |                                                    |   |                                             |                                                   |                                      |
|---------------|--------|--------|-----|-----|-------|----------------------------------------------------|---|---------------------------------------------|---------------------------------------------------|--------------------------------------|
| <b>P1_233</b> | 222554 | 223126 | 191 | ATG | 61.43 | Conserved hypothetical protein                     | - | <i>Methylocystis</i> sp. strain<br>Rockwell | Hypothetical protein<br>Met49242DRAFT_3772        | 42% identical over<br>104 aa (3e-19) |
| <b>P1_234</b> | 223129 | 223797 | 223 | ATG | 63.38 | Transglycosylase SLT domain-<br>containing protein | - | <i>Desulfovibrio alaskensis</i><br>G20      | Transglycosylase SLT<br>domain-containing protein | 34% identical over<br>126 aa (5e-09) |
| <b>P1_235</b> | 223803 | 224378 | 192 | ATG | 63.72 | Succinoglycan biosynthesis protein                 | - | <i>Methylocystis</i> sp. strain<br>Rockwell | Succinoglycan biosynthesis<br>protein             | 63% identical over<br>185 aa (4e-73) |
| <b>P1_236</b> | 224384 | 225289 | 302 | ATG | 65.56 | Virulence-associated protein E                     | - | <i>Methylocystis</i> sp. strain<br>Rockwell | Virulence-associated<br>protein E                 | 42% identical over<br>279 aa (1e-57) |
| <b>P1_237</b> | 226951 | 225500 | 484 | ATG | 56.75 | Conserved hypothetical protein                     | - | <i>Mesorhizobium loti</i><br>MAFF303099     | Hypothetical protein<br>mlr6204                   | 95% identical over<br>484 aa (0.0)   |
| <b>P1_238</b> | 228273 | 226951 | 441 | ATG | 56.16 | Conserved hypothetical protein                     | - | <i>Mesorhizobium loti</i><br>MAFF303099     | Hypothetical protein<br>mlr6203                   | 91% identical over<br>441 aa (0.0)   |
| <b>P1_239</b> | 229120 | 228560 | 187 | ATG | 58.65 | Putative transcriptional regulator                 | - | <i>Methylocystis</i> sp. strain<br>Rockwell | Helix-turn-helix domain-<br>containing protein    | 55% identical over<br>157 aa (1e-55) |
| <b>P1_240</b> | 229314 | 229568 | 85  | TTG | 72.55 | Conserved hypothetical protein                     | - | <i>Mesorhizobium</i> sp. BNC1<br>Meso_4593  | Hypothetical protein<br>Meso_4593                 | 57% identical over<br>67 aa (8e-15)  |

**Table S3. The ORFs present in pBSC2-2 and their annotations.**

| ORF identifier | Begin cds | End cds | Size (aa) | First codon | % G+C content | Product                                                            | Gene Name | Organism of protein to which most similar | Homolog protein                                                    | Similarity (e- value)                         |
|----------------|-----------|---------|-----------|-------------|---------------|--------------------------------------------------------------------|-----------|-------------------------------------------|--------------------------------------------------------------------|-----------------------------------------------|
| <b>P2_1</b>    | 49        | 432     | 384       | ATG         | 58.85         | Single-strand DNA binding protein/primosomal replication protein n | -         | <i>Nitrobacter hamburgensis</i> X14       | Single-strand DNA binding protein/primosomal replication protein n | 50% identical over 104 aa (3e-08)             |
| <b>P2_2</b>    | 707       | 528     | 60        | ATG         | 51.36         | Hypothetical protein                                               | -         | No significant homology                   | -                                                                  | -                                             |
| <b>P2_3</b>    | 1230      | 964     | 89        | ATG         | 61.8          | Conserved hypothetical protein                                     | -         | <i>Yersinia enterocolitica</i>            | Uncharacterized protein                                            | 37% identical over 59 aa (1.0)                |
| <b>P2_4</b>    | 2345      | 1347    | 333       | ATG         | 63.96         | Nitrile hydratase                                                  | -         | <i>Mycobacterium vanbaalenii</i> DSM 7251 | Nitrile hydratase, beta subunit                                    | 60 % identical over 142 aa (22 - 163) (2e-38) |
|                |           |         |           |             |               |                                                                    |           |                                           | Nitrile hydratase, beta subunit                                    | 72% identical over 83 aa (187 -269) (4e-25)   |
| <b>P2_5</b>    | 2422      | 2622    | 67        | GTG         | 59.2          | Hypothetical protein                                               | -         | No significant homology                   | -                                                                  | -                                             |
| <b>P2_6</b>    | 3477      | 2758    | 240       | ATG         | 61.81         | RNA polymerase, sigma-24 subunit, ECF subfamily                    | -         | <i>Variovorax paradoxus</i> S110          | RNA polymerase, sigma-24 subunit, ECF subfamily                    | 63% identical over 205 aa (1e-58)             |
| <b>P2_7</b>    | 4363      | 3689    | 225       | ATG         | 61.19         | Conserved hypothetical protein                                     | -         | <i>Nocardioides</i> sp. BAA-499           | Uncharacterized protein                                            | 53% identical over 172 aa (6e-41)             |
| <b>P2_8</b>    | 4355      | 4582    | 76        | GTG         | 55.26         | Hypothetical protein                                               | -         | -                                         | -                                                                  | -                                             |
| <b>P2_9</b>    | 5415      | 4891    | 175       | GTG         | 58.29         | Conserved hypothetical protein                                     | -         | <i>Burkholderia ambifaria</i> MEX-5       | Uncharacterized protein                                            | 65% identical over 175 aa (2e-66)             |
| <b>P2_10</b>   | 5637      | 5431    | 69        | ATG         | 52.66         | Conserved hypothetical protein                                     | -         | <i>Sphingomonas wittichii</i>             | Uncharacterized protein                                            | 85% identical over                            |

|              |       |       |     |     |       |                                                         |             | RW1                                                |                                                          | 69 aa (3e-20)                        |
|--------------|-------|-------|-----|-----|-------|---------------------------------------------------------|-------------|----------------------------------------------------|----------------------------------------------------------|--------------------------------------|
| <b>P2_11</b> | 5781  | 6743  | 321 | ATG | 56.8  | Integrase catalytic region                              | -           | <i>Rhodomicrobium vannielii</i><br>ATCC 17100      | Integrase catalytic region                               | 86% identical over<br>321 aa (0.0)   |
| <b>P2_12</b> | 6854  | 7048  | 65  | GTG | 62.05 | Putative integrase                                      | -           | <i>Roseovarius</i> sp. 217                         | Putative<br>integrase/recombinase protein                | 78% identical over<br>64 aa (1e-26)  |
| <b>P2_13</b> | 7057  | 8241  | 395 | GTG | 67.26 | Putative transposase for<br>insertion sequence element  | -           | alphaproteobacterium<br>BAL199                     | Putative transposase for<br>insertion sequence element   | 64% identical over<br>392 aa (e-128) |
| <b>P2_14</b> | 8448  | 8242  | 69  | GTG | 63.29 | Hypothetical protein                                    | -           | -                                                  | -                                                        | -                                    |
| <b>P2_15</b> | 8663  | 9205  | 181 | ATG | 64.83 | Putative transposase                                    | -           | <i>Azorhizobium caulinodans</i><br>ATCC 43989      | Putative transposase                                     | 84% identical over<br>161 aa (1e-69) |
| <b>P2_16</b> | 9232  | 9624  | 131 | GTG | 60.56 | Putative transposase                                    | -           | <i>Ochrobactrum intermedium</i><br>LMG 3301        | Transposase-like protein                                 | 60% identical over<br>131 aa (9e-37) |
| <b>P2_17</b> | 9719  | 9904  | 62  | ATG | 58.6  | Putative transposase                                    | -           | <i>Sphingobium japonicum</i><br>NBRC 101211        | Putative transposase                                     | 72% identical over<br>44 aa (1e-06)  |
| <b>P2_18</b> | 10364 | 11944 | 527 | ATG | 62.56 | Drug resistance transporter,<br>EmrB/ QacA subfamily    | -           | <i>Methylobacter</i><br><i>tundripaludum</i> SV96  | Drug resistance transporter,<br>EmrB/QacA subfamily      | 50% identical over<br>522 aa (e-127) |
| <b>P2_19</b> | 12016 | 12180 | 55  | ATG | 53.94 | CheB methylesterase                                     | -           | <i>Sinorhizobium meliloti</i><br>BL225C            | Chemotaxis-specific protein-<br>glutamate methylesterase | 65% identical over<br>55 aa (6e-13)  |
| <b>P2_20</b> | 13004 | 12582 | 141 | ATG | 57.92 | Putative transposase                                    | -           | <i>Nitrobacter winogradskyi</i><br>Nb-255          | IstB-like ATP-binding protein                            | 78% identical over<br>71 aa (6e-25)  |
| <b>P2_21</b> | 13022 | 13345 | 108 | ATG | 60.49 | Single-strand DNA-binding<br>protein                    | -           | <i>Sphingobium japonicum</i><br>NBRC 101211        | Probable single-strand DNA-<br>binding protein           | 49% identical over<br>51 aa (2e-04)  |
| <b>P2_22</b> | 13646 | 13404 | 81  | TTG | 60.91 | Hypothetical protein                                    | -           | No significant homology                            | -                                                        | -                                    |
| <b>P2_23</b> | 14026 | 14766 | 247 | ATG | 63.56 | Putative ParA-like ATPase,<br>plasmid partition protein | <i>parA</i> | <i>Bradyrhizobium</i> sp. BTa11<br>plasmid pBBta01 | Putative ParA-like (IncC)<br>ATPase                      | 74% identical over<br>245 aa (2e-97) |

|              |       |       |     |     |       |                                          |             |                                                 |                                             |                                   |
|--------------|-------|-------|-----|-----|-------|------------------------------------------|-------------|-------------------------------------------------|---------------------------------------------|-----------------------------------|
| <b>P2_24</b> | 14782 | 15750 | 323 | ATG | 59.86 | Putative ParB, plasmid partition protein | <i>parB</i> | <i>Bradyrhizobium</i> sp. BTAi1 plasmid pBBta01 | Putative ParB-like (KorB) partition protein | 49% identical over 320 aa (4e-65) |
| <b>P2_25</b> | 15905 | 16420 | 172 | ATG | 63.18 | Conserved hypothetical protein           | -           | <i>Bradyrhizobium</i> sp. BTAi1 plasmid pBBta01 | Uncharacterized protein                     | 69% identical over 172 aa (4e-54) |
| <b>P2_26</b> | 16420 | 17493 | 358 | ATG | 64.8  | Conserved hypothetical protein           | -           | <i>Bradyrhizobium</i> sp. BTAi1 plasmid pBBta01 | Uncharacterized protein                     | 75% identical over 345 aa (e-116) |
| <b>P2_27</b> | 19529 | 17781 | 583 | ATG | 45.97 | Conserved hypothetical protein           | -           | <i>Desulfovibrio aespoeensis</i> Aspo-2         | Abortive phage infection protein            | 33% identical over 219 aa (8e-17) |
| <b>P2_28</b> | 19857 | 20168 | 104 | ATG | 61.86 | UvrD/REP helicase                        | -           | <i>Rhodopseudomonas palustris</i> TIE-1         | UvrD/REP helicase                           | 51% identical over 60 aa (1e-10)  |
| <b>P2_29</b> | 20175 | 21302 | 376 | ATG | 58.69 | DNA-directed DNA polymerase              | <i>dinB</i> | <i>Methylocystis</i> sp. strain <i>Rockwell</i> | DNA-directed DNA polymerase                 | 74% identical over 353 aa (0.0)   |
| <b>P2_30</b> | 21839 | 21360 | 160 | ATG | 54.17 | Conserved hypothetical protein           | -           | <i>Octadecabacter antarcticus</i> 238           | Uncharacterized protein                     | 42% identical over 126 aa (4e-23) |
| <b>P2_31</b> | 22106 | 22402 | 99  | TTG | 52.86 | Hypothetical protein                     | -           | No significant homology                         | -                                           | -                                 |
| <b>P2_32</b> | 23051 | 22581 | 157 | GTG | 60.08 | Putative transposase                     | -           | <i>Rhodopseudomonas palustris</i> BisB18        | Putative transposase                        | 82% identical over 156 aa (2e-71) |
| <b>P2_33</b> | 23647 | 23141 | 169 | ATG | 62.13 | Putative transposase                     | -           | <i>Rhodopseudomonas palustris</i> BisB18        | Transposase and inactivated derivative      | 75% identical over 167 aa (1e-60) |
| <b>P2_34</b> | 26090 | 23874 | 739 | ATG | 62.74 | Helicase, RecD/TraA family protein       | -           | <i>Methylobacterium</i> sp. 4-46                | Helicase, RecD/TraA family protein          | 70% identical over 724 aa (0.0)   |
| <b>P2_35</b> | 26637 | 26254 | 128 | ATG | 63.02 | Hypothetical protein                     | -           | No significant homology                         | -                                           | -                                 |
| <b>P2_36</b> | 26803 | 27072 | 90  | ATG | 62.96 | Transcriptional regulator                | -           | <i>Parvibaculum lavamentivorans</i> DS-1        | Helix-turn-helix domain protein             | 57% identical over 80 aa (2e-14)  |
| <b>P2_37</b> | 28122 | 27100 | 341 | ATG | 64.91 | Conserved hypothetical protein           | -           | <i>Bradyrhizobium</i> sp. BTAi1                 | Uncharacterized protein                     | 36% identical over                |



|              |       |       |     |     |       |                                           |               |                                                 |                                          |                                   |
|--------------|-------|-------|-----|-----|-------|-------------------------------------------|---------------|-------------------------------------------------|------------------------------------------|-----------------------------------|
|              |       |       |     |     |       |                                           |               | plasmid pBBta01                                 |                                          | 341 aa (9e-43)                    |
| <b>P2_38</b> | 29953 | 28109 | 615 | GTG | 61.63 | Type IV secretory pathway protein, VirD4  | <i>virD4</i>  | <i>Bradyrhizobium</i> sp. BTAi1 plasmid pBBta01 | Type IV secretory pathway protein VirD4  | 80% identical over 613 aa (0.0)   |
| <b>P2_39</b> | 31049 | 30021 | 343 | GTG | 64.82 | Type IV secretory pathway protein, AvhB11 | <i>avhB11</i> | <i>Bradyrhizobium</i> sp. BTAi1 plasmid pBBta01 | Type IV secretory pathway AvhB11 protein | 81% identical over 341 aa (e-149) |
| <b>P2_40</b> | 32188 | 31049 | 380 | ATG | 65.35 | Type IV secretory pathway protein, AvhB10 | <i>avhB10</i> | <i>Bradyrhizobium</i> sp. BTAi1 plasmid pBBta01 | Type IV secretory pathway AvhB10 protein | 68% identical over 379 aa (e-125) |
| <b>P2_41</b> | 33053 | 32202 | 284 | GTG | 64.44 | Type IV secretory pathway protein, AvhB9  | <i>avhB9</i>  | <i>Bradyrhizobium</i> sp. BTAi1 plasmid pBBta01 | Type IV secretory pathway AvhB9 protein  | 77% identical over 274 aa (e-107) |
| <b>P2_42</b> | 33721 | 33053 | 223 | ATG | 65.02 | Type IV secretory pathway protein, AvhB8  | <i>avhB8</i>  | <i>Bradyrhizobium</i> sp. BTAi1 plasmid pBBta01 | Type IV secretory pathway AvhB8 protein  | 81% identical over 223 aa (5e-88) |
| <b>P2_43</b> | 34050 | 33727 | 108 | ATG | 65.12 | Type IV secretory pathway protein, AvhB7  | <i>avhB7</i>  | <i>Bradyrhizobium</i> sp. BTAi1 plasmid pBBta01 | Type IV secretory pathway AvhB7 protein  | 48% identical over 102 aa (2e-09) |
| <b>P2_44</b> | 35067 | 34108 | 320 | ATG | 64.58 | Type IV secretory pathway protein, AvhB6  | <i>avhB6</i>  | <i>Bradyrhizobium</i> sp. BTAi1 plasmid pBBta01 | Type IV secretory pathway AvhB6 protein  | 81% identical over 319 aa (e-101) |
| <b>P2_45</b> | 35375 | 35082 | 98  | ATG | 62.59 | Conserved hypothetical protein            | -             | <i>Bradyrhizobium</i> sp. BTAi1 plasmid pBBta01 | Uncharacterized protein                  | 49% identical over 85 aa (2e-14)  |
| <b>P2_46</b> | 36088 | 35375 | 238 | ATG | 61.06 | Type IV secretory pathway protein, AvhB5  | <i>avhB5</i>  | <i>Bradyrhizobium</i> sp. BTAi1 plasmid pBBta01 | Type IV secretory pathway AvhB5 protein  | 80% identical over 223 aa (4e-82) |
| <b>P2_47</b> | 38451 | 36088 | 788 | ATG | 63.41 | Type IV secretory pathway protein, AvhB4  | <i>avhB4</i>  | <i>Bradyrhizobium</i> sp. BTAi1 plasmid pBBta01 | Type IV secretory pathway AvhB4 protein  | 82% identical over 788 aa (0.0)   |
| <b>P2_48</b> | 38779 | 38447 | 111 | ATG | 62.16 | Type IV secretory pathway protein, AvhB3  | <i>avhB3</i>  | <i>Bradyrhizobium</i> sp. BTAi1 plasmid pBBta01 | Type IV secretory pathway AvhB3 protein  | 79% identical over 111 aa (9e-45) |
| <b>P2_49</b> | 39075 | 38785 | 97  | ATG | 58.08 | Type IV secretory pathway protein, AvhB2  | <i>avhB2</i>  | <i>Bradyrhizobium</i> sp. BTAi1 plasmid pBBta01 | Type IV secretory pathway AvhB2 protein  | 80% identical over 95 aa (7e-26)  |

|              |       |       |     |     |       |                                             |              |                                                 |                                                         |                                    |
|--------------|-------|-------|-----|-----|-------|---------------------------------------------|--------------|-------------------------------------------------|---------------------------------------------------------|------------------------------------|
| <b>P2_50</b> | 39857 | 39153 | 235 | TTG | 62.13 | Type IV secretory pathway protein, AvhB1    | <i>avhB1</i> | <i>Bradyrhizobium</i> sp. BTAi1 plasmid pBBta01 | Type IV secretory pathway AvhB1 protein                 | 53% identical over 188 aa (3e-39)  |
| <b>P2_51</b> | 40099 | 40824 | 242 | ATG | 56.34 | Transcriptional regulator, LuxR family      | <i>traR</i>  | <i>Bradyrhizobium</i> sp. BTAi1 plasmid pBBta01 | Transcriptional regulator, LuxR family                  | 53% identical over 242 aa (1e-64)  |
| <b>P2_52</b> | 41358 | 41167 | 64  | TTG | 64.06 | Hypothetical protein                        | -            | No significant homology                         | -                                                       | -                                  |
| <b>P2_53</b> | 41805 | 42080 | 92  | ATG | 59.78 | Hypothetical protein                        | -            | No significant homology                         | -                                                       | -                                  |
| <b>P2_54</b> | 42088 | 42408 | 107 | ATG | 59.5  | Putative integron gene cassette protein     | -            | Uncultured bacterium                            | Putative integron gene cassette protein                 | 69% identical over 100 aa (8e-28)  |
| <b>P2_55</b> | 42456 | 43442 | 329 | ATG | 63.22 | Transcriptional regulator, AraC family      | -            | <i>Methylocystis</i> sp. strain Rockwell        | Transcriptional regulator, AraC family                  | 64% identical over 317 aa (8e-149) |
| <b>P2_56</b> | 43653 | 44423 | 257 | ATG | 58.37 | Particulate methane monooxygenase subunit C | <i>pmoC</i>  | <i>Methylocystis</i> sp. strain Rockwell        | Particulate methane monooxygenase subunit C (singleton) | 89% identical over 256 aa (3e-172) |
| <b>P2_57</b> | 44564 | 45208 | 215 | ATG | 63.88 | Conserved hypothetical protein              | -            | <i>Methylocystis</i> sp. strain Rockwell        | Hypothetical protein                                    | 46% identical over 190 aa (2e-54)  |
| <b>P2_58</b> | 46232 | 45660 | 191 | ATG | 49.04 | Conserved hypothetical protein              | -            | No significant homology                         | Hypothetical protein P3TCK_10093                        | 26% identical over 163 aa (1e-07)  |
| <b>P2_59</b> | 46736 | 47029 | 98  | ATG | 51.02 | Hypothetical protein                        | -            | No significant homology                         | -                                                       | -                                  |
| <b>P2_60</b> | 47039 | 48496 | 486 | ATG | 51.78 | Radical SAM domain protein                  | -            | <i>Acidiphilium cryptum</i> JF-5                | Radical SAM domain protein                              | 49% identical over 483 aa (e-138)  |
| <b>P2_61</b> | 48499 | 49695 | 399 | ATG | 52.88 | Radical SAM domain protein                  | -            | <i>Acidiphilium cryptum</i> JF-5                | Radical SAM domain protein                              | 64% identical over 45 aa (2e-06)   |
| <b>P2_62</b> | 49712 | 50287 | 192 | ATG | 58.51 | Conserved hypothetical protein              | -            | <i>Rhodobacter capsulatus</i> ATCC BAA-309      | Uncharacterized protein                                 | 64% identical over 45 aa (2e-06)   |
| <b>P2_63</b> | 50403 | 50876 | 158 | ATG | 55.49 | Putative nuclease                           | -            | <i>Methylobacterium</i>                         | Nuclease (SNase domain)                                 | 54% identical over                 |

|              |       |       |      |     |       |                                                                                           |             |                                                    |                                                                                              |                                       |                |
|--------------|-------|-------|------|-----|-------|-------------------------------------------------------------------------------------------|-------------|----------------------------------------------------|----------------------------------------------------------------------------------------------|---------------------------------------|----------------|
|              |       |       |      |     |       |                                                                                           |             |                                                    | <i>extorquens</i> PA1                                                                        | protein)                              | 155 aa (7e-50) |
| <b>P2_64</b> | 51454 | 55023 | 1190 | ATG | 56.78 | Superfamily I DNA/RNA<br>helicase                                                         | -           | <i>Caulobacter</i> sp. K31                         | Superfamily I DNA or RNA<br>helicase or helicase subunit-<br>like protein                    | 40% identical over<br>1188 aa (0.0)   |                |
| <b>P2_65</b> | 55023 | 56780 | 586  | ATG | 57.34 | Phosphatidylserine/phosphatidylg<br>lycerophosphate/ cardiolipin<br>synthase-like protein | -           | <i>Caulobacter</i> sp. K31                         | Phosphatidylserine/phosphati<br>dylglycerophosphate/<br>cardiolipin synthase-like<br>protein | 37% identical over<br>585 aa (4e-99)  |                |
| <b>P2_66</b> | 57446 | 59515 | 690  | ATG | 61.48 | ParB-like nuclease                                                                        | -           | <i>Methylocystis</i> sp. strain<br>Rockwell        | ParB domain protein nuclease                                                                 | 64% identical over<br>690 aa (0.0)    |                |
| <b>P2_67</b> | 59599 | 60015 | 139  | ATG | 61.87 | Conserved hypothetical protein                                                            | -           | <i>Mesorhizobium</i> sp. BNC1                      | Uncharacterized protein                                                                      | 50% identical over<br>114 aa (7e-24)  |                |
| <b>P2_68</b> | 60108 | 64562 | 1485 | ATG | 63.86 | Methylase/helicase                                                                        | -           | <i>Cyanothece</i> sp. CCY0110                      | Probable methylase/helicase                                                                  | 46% identical over<br>1435 aa (0.0)   |                |
| <b>P2_69</b> | 64562 | 65575 | 338  | TTG | 61.64 | Conserved hypothetical protein                                                            | -           | <i>Rhodopseudomonas</i><br><i>palustris</i> BisA53 | Uncharacterized protein                                                                      | 51% identical over<br>332 aa (8e-76)  |                |
| <b>P2_70</b> | 66326 | 65901 | 142  | ATG | 67.14 | Mercuric transport protein, MerT                                                          | <i>merT</i> | <i>Methylocystis</i> sp. strain<br>Rockwell        | Mercuric transport protein<br>MerT                                                           | 81% identical over<br>142 aa (8e-65)  |                |
| <b>P2_71</b> | 66379 | 66804 | 142  | ATG | 64.08 | Transcriptional regulator,<br>MerR family protein                                         | <i>merR</i> | <i>Methylocystis</i> sp. strain<br>Rockwell        | Transcriptional regulator,<br>MerR family protein                                            | 81% identical over<br>129 aa (6e-68)  |                |
| <b>P2_72</b> | 67605 | 66823 | 261  | GTG | 63.09 | Conserved hypothetical protein                                                            | -           | <i>Methylocystis</i> sp. strain<br>Rockwell        | Protein of unknown function<br>DUF81                                                         | 82% identical over<br>261 aa (4e-131) |                |
| <b>P2_73</b> | 68153 | 69085 | 311  | ATG | 61.84 | Conserved hypothetical protein                                                            | -           | <i>Methylocystis</i> sp. strain<br>Rockwell        | Protein of unknown function<br>DUF2493                                                       | 86% identical over<br>294 aa (0.0)    |                |
| <b>P2_74</b> | 69197 | 70465 | 423  | GTG | 58.08 | Plasmid partitioning protein,                                                             | <i>repA</i> | <i>Methylobacterium nodulans</i>                   | Plasmid partitioning protein                                                                 | 77% identical over                    |                |

|              |       |       |     |     |       |                                    |             |                                  |                               |                    |
|--------------|-------|-------|-----|-----|-------|------------------------------------|-------------|----------------------------------|-------------------------------|--------------------|
|              |       |       |     |     |       | RepA                               |             | ORS2060                          | RepA                          | 391 aa (e-172)     |
| <b>P2_75</b> | 70465 | 71445 | 327 | ATG | 59.84 | Plasmid partitioning protein,      | <i>repB</i> | <i>Methylobacterium nodulans</i> | Plasmid partitioning protein  | 50% identical over |
|              |       |       |     |     |       | RepB                               |             | ORS2060                          | RepB                          | 323 aa (3e-66)     |
| <b>P2_76</b> | 71639 | 73006 | 456 | ATG | 63.96 | Replication protein C              | <i>repC</i> | <i>Methylocystis</i> sp. strain  | Replication protein C         | 74% identical over |
|              |       |       |     |     |       |                                    |             | Rockwell                         |                               | 456 aa (0.0)       |
| <b>P2_77</b> | 73006 | 73299 | 98  | ATG | 64.18 | Hypothetical protein               | -           | No significant homology          | -                             | -                  |
| <b>P2_78</b> | 73609 | 73436 | 58  | TTG | 56.32 | Conserved hypothetical protein     | -           | <i>Parvularcula bermudensis</i>  | Hypothetical protein          | 58% identical over |
|              |       |       |     |     |       |                                    |             | HTCC2503                         | PB2503_12564                  | 43 aa (0.001)      |
| <b>P2_79</b> | 73982 | 73638 | 115 | ATG | 64.64 | Putative transcriptional regulator |             | <i>Bordetella parapertussis</i>  | Putative DNA-binding protein  | 44% identical over |
|              |       |       |     |     |       |                                    |             | 12822                            |                               | 90 aa (2e-15)      |
| <b>P2_80</b> | 74334 | 73990 | 115 | ATG | 60.0  | Conserved hypothetical protein     |             | <i>Methylobacterium</i>          | Uncharacterized protein       | 59% identical over |
|              |       |       |     |     |       |                                    |             | <i>extorquens</i> DM4            |                               | 101 aa (2e-29)     |
| <b>P2_81</b> | 75674 | 74433 | 414 | ATG | 66.02 | Integrase family protein           | -           | <i>Methylocystis</i> sp. strain  | Integrase family protein      | 72% identical over |
|              |       |       |     |     |       |                                    |             | Rockwell                         |                               | 388 aa (0.0)       |
| <b>P2_82</b> | 75767 | 77380 | 538 | ATG | 66.42 | Plasmid replication initiator      | -           | <i>Rhodobacter sphaeroides</i>   | Plasmid replication initiator | 63% identical over |
|              |       |       |     |     |       | protein                            |             | ATCC 17025                       | protein                       | 530 aa (0.0)       |
| <b>P2_83</b> | 77376 | 78254 | 293 | ATG | 64.85 | Conserved hypothetical protein     | -           | <i>Rhodobacter sphaeroides</i>   | Hypothetical protein          | 67% identical over |
|              |       |       |     |     |       |                                    |             | ATCC 17025                       | Rsph17025_4235                | 293 aa (2e-136)    |
| <b>P2_84</b> | 78254 | 79294 | 347 | TTG | 69.45 | Conserved hypothetical protein     | -           | <i>Rhodobacter sphaeroides</i>   | Hypothetical protein          | 45% identical over |
|              |       |       |     |     |       |                                    |             | ATCC 17025                       | Rsph17025_4234                | 314 aa (3e-71)     |
| <b>P2_85</b> | 79363 | 79548 | 62  | ATG | 59.14 | Hypothetical protein               | -           | No significant homology          | -                             | -                  |
| <b>P2_86</b> | 79583 | 80656 | 358 | ATG | 73.56 | Conserved hypothetical protein     | -           | <i>Methylocystis</i> sp. strain  | Protein of unknown function   | 62% identical over |
|              |       |       |     |     |       |                                    |             | Rockwell                         | DUF1403                       | 358 aa (2e-103)    |
| <b>P2_87</b> | 80656 | 81348 | 231 | ATG | 69.41 | Chromosome segregation and         | -           | <i>Methylocystis</i> sp. strain  | Chromosome segregation and    | 79% identical over |
|              |       |       |     |     |       | condensation protein, ScpB         |             | Rockwell                         | condensation protein, ScpB    | 201 aa (7e-107)    |

|               |       |       |     |     |       |                                                                              |   |                                                           |                                                                              |                                    |
|---------------|-------|-------|-----|-----|-------|------------------------------------------------------------------------------|---|-----------------------------------------------------------|------------------------------------------------------------------------------|------------------------------------|
| <b>P2_88</b>  | 81348 | 82673 | 442 | GTG | 62.59 | Iron-containing alcohol dehydrogenase                                        | - | <i>Methylocystis</i> sp. strain Rockwell                  | Iron-containing alcohol dehydrogenase                                        | 69% identical over 340 aa (2e-156) |
| <b>P2_89</b>  | 82757 | 82918 | 54  | ATG | 53.7  | Hypothetical protein                                                         | - | No significant homology                                   | -                                                                            | -                                  |
| <b>P2_90</b>  | 82918 | 83199 | 94  | TTG | 64.89 | Hypothetical protein                                                         | - | No significant homology                                   | -                                                                            | -                                  |
| <b>P2_91</b>  | 83213 | 84217 | 335 | ATG | 63.68 | FAD dependent oxidoreductase                                                 | - | <i>Oceanibulbus indolifex</i> HEL-45                      | Dehydrogenase subunit                                                        | 53% identical over 261 aa (2e-95)  |
| <b>P2_92</b>  | 84217 | 84921 | 235 | GTG | 58.16 | Transposase, IS204/IS1001/IS1096/IS1165 family protein                       | - | <i>Beijerinckia indica</i> subsp. <i>indica</i> ATCC 9039 | Transposase, IS204/IS1001/IS1096/IS1165 family protein                       | 56% identical over 182 aa (3e-62)  |
| <b>P2_93</b>  | 84926 | 85741 | 272 | GTG | 57.48 | Signal transduction histidine kinase with response regulator receiver domain | - | <i>Bradyrhizobium</i> sp. BTAi1                           | Signal transduction histidine kinase with response regulator receiver domain | 48% identical over 240 aa (3e-61)  |
| <b>P2_94</b>  | 87536 | 85965 | 524 | ATG | 52.61 | RND efflux system, outer membrane lipoprotein, NodT family                   | - | <i>Methylosinus trichosporium</i> OB3b                    | NodT family RND efflux system outer membrane lipoprotein                     | 63% identical over 501 aa (0.0)    |
| <b>P2_95</b>  | 88879 | 87674 | 402 | ATG | 56.72 | Efflux transporter, RND family, MFP subunit                                  | - | <i>Methylosinus trichosporium</i> OB3b                    | Efflux transporter, RND family, MFP subunit                                  | 68% identical over 382 aa (0.0)    |
| <b>P2_96</b>  | 91521 | 88882 | 880 | GTG | 58.07 | Acriflavin resistance protein                                                | - | <i>Methylosinus trichosporium</i> OB3b                    | Acriflavin resistance protein                                                | 76% identical over 872 aa (0.0)    |
| <b>P2_97</b>  | 93029 | 91554 | 492 | ATG | 59.96 | Transposase                                                                  | - | <i>Methylocystis</i> sp. strain Rockwell                  | Transposase                                                                  | 94% identical over 184 aa (7e-114) |
| <b>P2_98</b>  | 94506 | 93130 | 459 | ATG | 65.07 | Transposase                                                                  | - | <i>Methylocystis</i> sp. strain Rockwell                  | Transposase                                                                  | 94% identical over 340 aa (0.0)    |
| <b>P2_99</b>  | 94912 | 94562 | 117 | ATG | 64.67 | Transposase, IS66 family protein                                             | - | <i>Methylocystis</i> sp. strain Rockwell                  | IS66 family protein, Orf2                                                    | 98% identical over 117 aa (4e-78)  |
| <b>P2_100</b> | 95361 | 94915 | 149 | ATG | 66.89 | Transposase, IS3/IS911 family                                                | - | <i>Methylocystis</i> sp. strain                           | Transposase, IS3/IS911                                                       | 93% identical over                 |

|               |        |        |     |     |       | protein                                                           |   | Rockwell                                                | family protein                                                      | 149 aa (8e-91)                        |
|---------------|--------|--------|-----|-----|-------|-------------------------------------------------------------------|---|---------------------------------------------------------|---------------------------------------------------------------------|---------------------------------------|
| <b>P2_101</b> | 96134  | 95394  | 247 | GTG | 54.93 | Acriflavin resistance protein                                     | - | <i>Methylosinus trichosporium</i><br>OB3b               | Acriflavin resistance protein                                       | 78% identical over<br>233 aa (8e-124) |
| <b>P2_102</b> | 96567  | 96241  | 109 | GTG | 60.55 | Hypothetical protein                                              | - | No significant homology                                 | -                                                                   | -                                     |
| <b>P2_103</b> | 96840  | 96655  | 62  | ATG | 52.15 | Hypothetical protein                                              | - | No significant homology                                 | -                                                                   | -                                     |
| <b>P2_104</b> | 97087  | 98487  | 467 | ATG | 56.96 | Transposase                                                       | - | <i>Azospirillum brasilense</i><br>Sp245                 | Transposase                                                         | 35% identical over<br>450 aa (6e-77)  |
| <b>P2_105</b> | 99186  | 98383  | 268 | TTG | 64.55 | Transposase                                                       | - | <i>Methylocystis</i> sp. strain<br>Rockwell             | Transposase                                                         | 90% identical over<br>213 aa (1e-136) |
| <b>P2_106</b> | 99487  | 99167  | 107 | ATG | 62.93 | Transposase                                                       | - | <i>Methylocystis</i> sp. strain<br>Rockwell             | Transposase                                                         | 89% identical over<br>94 aa (7e-48)   |
| <b>P2_107</b> | 99988  | 102075 | 696 | ATG | 64.32 | Transposase                                                       | - | <i>Sinorhizobium fredii</i><br>NGR234                   | Transposase number 4 of<br>insertion sequence NGRIS-4b              | 39% identical over<br>661 aa (2e-129) |
| <b>P2_108</b> | 102075 | 102773 | 233 | GTG | 64.52 | Conserved hypothetical protein                                    | - | <i>Magnetospirillum</i><br><i>gryphiswaldense</i> MSR-1 | Hypothetical protein mgI544                                         | 38% identical over<br>161 aa (9e-08)  |
| <b>P2_109</b> | 104277 | 103474 | 268 | ATG |       | Universal stress protein UspA-<br>like nucleotide-binding protein | - | <i>Magnetospirillum</i><br><i>magneticum</i> AMB-1      | Universal stress protein<br>UspA-like nucleotide-binding<br>protein | 33% identical over<br>267 aa (4e-38)  |
| <b>P2_110</b> | 105201 | 104731 | 157 | ATG | 63.48 | Transposase                                                       | - | <i>Methylocystis</i> sp. strain<br>Rockwell             | Transposase and inactivated<br>derivatives-like protein             | 87% identical over<br>157 aa (4e-97)  |
| <b>P2_111</b> | 105674 | 105291 | 128 | ATG | 66.41 | Transposase of insertion sequence<br>ISRm10-1                     | - | <i>Methylosinus trichosporium</i><br>OB3b               | Transposase of insertion<br>sequence ISRm10-1, orfA<br>protein      | 87% identical over<br>127 aa (6e-75)  |
| <b>P2_112</b> | 106474 | 106235 | 80  | ATG | 61.67 | Hypothetical protein                                              | - | No significant homology                                 | -                                                                   | -                                     |
| <b>P2_113</b> | 107115 | 106570 | 182 | ATG | 53.11 | Hypothetical protein                                              | - | No significant homology                                 | -                                                                   | -                                     |

|               |        |        |     |     |       |                                                                             |              |                                                       |                                                            |                                    |
|---------------|--------|--------|-----|-----|-------|-----------------------------------------------------------------------------|--------------|-------------------------------------------------------|------------------------------------------------------------|------------------------------------|
| <b>P2_114</b> | 107723 | 108862 | 380 | ATG | 60.61 | YVTN beta-propeller repeat-containing protein                               | -            | <i>Acidovorax</i> sp. JS42                            | YVTN beta-propeller repeat-containing protein              | 34% identical over 287 aa (1e-44)  |
| <b>P2_115</b> | 109117 | 109491 | 125 | ATG | 66.4  | Transposase                                                                 | -            | <i>Rhizobium leguminosarum</i> bv. <i>viciae</i> 3841 | Putative transposase                                       | 83% identical over 125 aa (5e-69)  |
| <b>P2_116</b> | 109491 | 109874 | 128 | TTG | 57.81 | Transposase                                                                 | -            | <i>Rhizobium leguminosarum</i> bv. <i>viciae</i> 3841 | Putative transposase                                       | 86% identical over 128 aa (7e-76)  |
| <b>P2_117</b> | 110014 | 110709 | 232 | ATG | 55.32 | RNA polymerase, sigma-24 subunit, ECF subfamily                             | -            | <i>Planctomyces brasiliensis</i> DSM 5305             | RNA polymerase, sigma-24 subunit, ECF subfamily            | 36% identical over 202 aa (1e-23)  |
| <b>P2_118</b> | 110734 | 110976 | 81  | ATG | 51.03 | Hypothetical protein                                                        | -            | No significant homology                               | -                                                          | -                                  |
| <b>P2_119</b> | 111026 | 112066 | 347 | TTG | 58.5  | multicopper oxidase type 3                                                  | -            | <i>Methylobacterium album</i> BG8                     | Multicopper oxidase type 3                                 | 69% identical over 311 aa (2e-164) |
| <b>P2_120</b> | 112098 | 113936 | 613 | ATG | 59.49 | Multicopper oxidase type 1                                                  | -            | <i>Methylobacterium album</i> BG8                     | Multicopper oxidase type 1                                 | 68% identical over 606 aa (0.0)    |
| <b>P2_121</b> | 114131 | 114733 | 201 | ATG | 58.71 | GTP cyclohydrolase I                                                        | <i>folE2</i> | <i>Methylocystis</i> sp. strain Rockwell              | GTP cyclohydrolase I                                       | 88% identical over 189 aa (5e-122) |
| <b>P2_122</b> | 115114 | 116301 | 396 | ATG | 64.14 | Secretion protein HlyD family protein                                       | -            | <i>Methylocystis</i> sp. strain Rockwell              | Secretion protein HlyD family protein                      | 71% identical over 396 aa (0.0)    |
| <b>P2_123</b> | 117856 | 116333 | 508 | ATG | 67.78 | Putative RND efflux system, outer membrane channel lipoprotein, NodT family | -            | <i>Methylocystis</i> sp. strain Rockwell              | RND efflux system, outer membrane lipoprotein, NodT family | 68% identical over 501 aa (0.0)    |
| <b>P2_124</b> | 118123 | 119046 | 308 | ATG | 54.11 | Transcriptional regulator, LysR family                                      | -            | <i>Paracoccus denitrificans</i> PD1222                | LysR family transcriptional regulator                      | 66% identical over 279 aa (1e-129) |
| <b>P2_125</b> | 119305 | 119529 | 75  | ATG | 56.44 | Hypothetical protein                                                        | -            | No significant homology                               | -                                                          | -                                  |
| <b>P2_126</b> | 119893 | 120132 | 80  | ATG | 53.33 | UspA domain-containing universal stress protein                             | -            | <i>Methylocystis</i> sp. strain Rockwell              | UspA domain-containing protein                             | 53% identical over 54 aa (1e-09)   |

|               |        |        |     |     |       |                                                 |   |                                                         |                                                                |                                       |
|---------------|--------|--------|-----|-----|-------|-------------------------------------------------|---|---------------------------------------------------------|----------------------------------------------------------------|---------------------------------------|
| <b>P2_127</b> | 120168 | 120551 | 128 | ATG | 66.67 | Transposase of insertion sequence<br>ISRM10-1   | - | <i>Methylosinus trichosporium</i><br>OB3b               | Transposase of insertion<br>sequence ISRM10-1, orfA<br>protein | 87% identical over<br>127 aa (2e-74)  |
| <b>P2_128</b> | 120641 | 121111 | 157 | ATG | 63.27 | Transposase                                     | - | <i>Methylosinus trichosporium</i><br>OB3b               | Transposase and inactivated<br>derivatives-like protein        | 88% identical over<br>157 aa (2e-98)  |
| <b>P2_129</b> | 121145 | 121801 | 219 | ATG | 57.23 | Putative universal stress protein               | - | <i>Methylocystis</i> sp. strain<br>Rockwell             | UspA domain-containing<br>protein                              | 43% identical over<br>202 aa (1e-46)  |
| <b>P2_130</b> | 121889 | 124192 | 768 | GTG | 62.28 | Nitric-oxide reductase                          | - | <i>Parvibaculum</i><br><i>lavamentivorans</i><br>DS-1   | Putative nitric-oxide<br>reductase                             | 74% identical over<br>767 aa (0.0)    |
| <b>P2_131</b> | 124509 | 124234 | 92  | GTG | 56.88 | Transposase                                     | - | <i>Methylocystis</i> sp. strain<br>Rockwell             | Putative transposase                                           | 84% identical over<br>92 aa (2e-50)   |
| <b>P2_132</b> | 124760 | 124413 | 116 | TTG | 61.21 | Transposase                                     | - | <i>Gluconacetobacter</i><br><i>diazotrophicus</i> PAI 5 | Transposase                                                    | 81% identical over<br>73 aa (1e-36)   |
| <b>P2_133</b> | 125919 | 125050 | 290 | ATG | 63.33 | Transposase                                     | - | <i>Gluconacetobacter</i><br><i>diazotrophicus</i> PAI 5 | Transposase                                                    | 65% identical over<br>284 aa (5e-118) |
| <b>P2_134</b> | 126174 | 125965 | 70  | ATG | 58.1  | Transposase                                     | - | <i>Gluconacetobacter</i><br><i>diazotrophicus</i> PAI 5 | Transposase                                                    | 41% identical over<br>58 aa (1e-04)   |
| <b>P2_135</b> | 126800 | 126294 | 169 | ATG | 61.54 | Transposase                                     | - | <i>Rhodopseudomonas</i><br><i>palustris</i><br>BisB18   | Transposase and inactivated<br>derivative                      | 74% identical over<br>167 aa (3e-84)  |
| <b>P2_136</b> | 126946 | 127269 | 108 | ATG | 59.26 | Invasion gene expression up-<br>regulator, SirB | - | <i>Methylophaga</i><br><i>aminisulfidivorans</i> MP     | Invasion gene expression up-<br>regulator SirB                 | 44% identical over<br>93 aa (6e-16)   |
| <b>P2_137</b> | 128522 | 127317 | 402 | ATG | 65.67 | NnrS protein                                    | - | <i>Nitrobacter</i> sp. Nb-311A                          | NnrS protein                                                   | 47% identical over<br>393 aa (7e-100) |



|               |        |        |     |     |       |                                                              |             |                                                  |                                                                |                                       |
|---------------|--------|--------|-----|-----|-------|--------------------------------------------------------------|-------------|--------------------------------------------------|----------------------------------------------------------------|---------------------------------------|
| <b>P2_138</b> | 128778 | 128605 | 58  | ATG | 54.02 | Transposase                                                  |             | <i>Sinorhizobium fredii</i><br>NGR234            | Transposase                                                    | 71% identical over<br>56 aa (2e-19)   |
| <b>P2_139</b> | 129869 | 128886 | 328 | ATG | 62.3  | ApbE family lipoprotein, putative<br>NosX                    | <i>nosX</i> | <i>Oligotropha</i><br><i>carboxidovorans</i> OM5 | ApbE family lipoprotein                                        | 50% identical over<br>317 aa (2e-97)  |
| <b>P2_140</b> | 130709 | 129882 | 276 | ATG | 60.87 | Nitrous-oxide reductase, NosY                                | <i>nosY</i> | <i>Bradyrhizobium</i> sp. BTAi1<br>(chromosome)  | Copper ABC transporter<br>permease NosY                        | 60% identical over<br>275 aa (1e-95)  |
| <b>P2_141</b> | 131602 | 130709 | 298 | ATG | 62.53 | Putative copper ABC transporter<br>ATP-binding protein, NosF | <i>nosF</i> | <i>Sinorhizobium meliloti</i><br>BL225C          | Putative copper ABC<br>transporter ATP-binding<br>protein NosF | 54% identical over<br>292 aa (7e-99)  |
| <b>P2_142</b> | 132840 | 131602 | 413 | ATG | 60.21 | Periplasmic copper-binding<br>protein, NosD                  | <i>nosD</i> | <i>Rhodospirillum centenum</i><br>SW             | Periplasmic copper-binding<br>protein, NosD                    | 60% identical over<br>370 aa (2e-164) |
| <b>P2_143</b> | 134789 | 132864 | 642 | ATG | 59.19 | Nitrous oxide reductase, NosZ                                | <i>nosZ</i> | <i>Rhodospirillum centenum</i><br>SW             | Nitrous oxide reductase NosZ                                   | 72% identical over<br>632 aa (0.0)    |
| <b>P2_144</b> | 136936 | 134798 | 713 | TTG | 62.37 | Nitrous oxide reductase<br>expression<br>regulator, NosR     | <i>nosR</i> | <i>Azospirillum brasilense</i>                   | Nitrous oxide reductase<br>transcription regulator, NosR       | 58% identical over<br>704 aa (0.0)    |
| <b>P2_145</b> | 137187 | 138041 | 285 | ATG | 61.64 | Hypothetical protein                                         | -           | <i>Rhodopseudomonas</i><br><i>palustris</i> DX-1 | Hypothetical protein<br>Rpx1_3445                              | 41% identical over<br>105 aa (9e-06)  |
| <b>P2_146</b> | 139019 | 138390 | 210 | ATG | 59.05 | Conserved hypothetical protein                               | -           | <i>Afipia</i> sp. 1NLS2                          | Protein of unknown function<br>DUF2478                         | 49% identical over<br>161 aa (7e-43)  |
| <b>P2_147</b> | 140062 | 140805 | 248 | ATG | 61.69 | Hydroxylamine reductase                                      | <i>hcp</i>  | <i>Methylosinus trichosporium</i><br>OB3b        | Hybrid cluster protein,<br>hydroxylamine reductase             | 94% identical over<br>239 aa (9e-150) |
| <b>P2_148</b> | 140805 | 141521 | 239 | ATG | 63.74 | Hydroxylamine reductase                                      | <i>hcp</i>  | <i>Methylosinus trichosporium</i><br>OB3b        | Hybrid cluster protein,<br>hydroxylamine reductase             | 83% identical over<br>241 aa (5e-124) |
| <b>P2_149</b> | 141596 | 141760 | 55  | ATG | 54.55 | Oxidoreductase FAD/NAD(P)-                                   | -           | <i>Methylosinus trichosporium</i>                | Oxidoreductase                                                 | 84% identical over                    |

|               |        |        |     |     |       | binding domain protein         |   | OB3b                                        | FAD/NAD(P)-binding<br>domain protein       | 31 aa (4e-08)                        |
|---------------|--------|--------|-----|-----|-------|--------------------------------|---|---------------------------------------------|--------------------------------------------|--------------------------------------|
| <b>P2_150</b> | 141949 | 142422 | 158 | ATG | 59.7  | Conserved hypothetical protein |   | <i>Methylocystis</i> sp. strain<br>Rockwell | Hypothetical protein<br>Met49242DRAFT_2113 | 73% identical over<br>146 aa (5e-73) |
| <b>P2_151</b> | 142595 | 142846 | 84  | GTG | 61.9  | Hypothetical protein           | - | No significant homology                     | -                                          | -                                    |
| <b>P2_152</b> | 142872 | 143084 | 71  | GTG | 56.81 | Hypothetical protein           | - | No significant homology                     | -                                          | -                                    |
